# Supplementary material for: The Native Bees of Texas: Evaluating the Benefits of a Public Engagement Course
Source: MDPI journal article supplement (doi:10.3390/insects12080702), 2021-08-05

## SUMMARY TABLES

| Test                                                                         |      | n  | % Correct | Std. Error | t-test | A    | B   | C   | D    | E   |
|------------------------------------------------------------------------------|------|----|-----------|------------|--------|------|-----|-----|------|-----|
| Q1. Fly and Bee. Which is the fly?                                           | Pre  | 19 | 100%      | 0.00       | 1.000  | 100% | 0%  |     |      |     |
|                                                                              | Post | 19 | 100%      | 0.00       |        | 100% | 0%  |     |      |     |
| Q2. Wasp and Bee. Which is the wasp?                                         | Pre  | 19 | 84%       | 0.09       | 0.187  | 16%  | 84% |     |      |     |
|                                                                              | Post | 19 | 68%       | 0.11       |        | 32%  | 68% |     |      |     |
| Q3. Bee and Flies. Which is the bee?                                         | Pre  | 19 | 63%       | 0.11       | 0.331  | 0%   | 37% | 63% | 0%   |     |
|                                                                              | Post | 19 | 79%       | 0.10       |        | 16%  | 5%  | 79% | 0%   |     |
| Q4. Bees. Which are the honey bees?                                          | Pre  | 19 | 42%       | 0.12       | 0.056  | 42%  | 16% | 16% | 26%  |     |
|                                                                              | Post | 19 | 68%       | 0.11       |        | 68%  | 16% | 0%  | 16%  |     |
| Q5. What sex is the leafcutter bee?                                          | Pre  | 19 | 42%       | 0.12       | 0.007  | 58%  | 42% |     |      |     |
|                                                                              | Post | 19 | 84%       | 0.09       |        | 16%  | 84% |     |      |     |
| Q6. Where do most native bees' nest?                                         | Pre  | 19 | 21%       | 0.10       | 0.000  | 21%  | 21% | 11% | 37%  | 11% |
|                                                                              | Post | 19 | 95%       | 0.05       |        | 5%   | 95% | 0%  | 0%   | 0%  |
| Q7. What features help me distinguish a bee from a fly or wasp in my garden? | Pre  | 19 | 53%       | 0.12       | 0.005  | 11%  | 26% | 0%  | 53%  | 11% |
|                                                                              | Post | 19 | 89%       | 0.07       |        | 0%   | 11% | 0%  | 89%  | 0%  |
| Q8. Why are bees important for ecosystem functions? Because they...          | Pre  | 19 | 74%       | 0.10       | 0.021  | 0%   | 21% | 5%  | 74%  | 0%  |
|                                                                              | Post | 19 | 100%      | 0.00       |        | 0%   | 0%  | 0%  | 100% | 0%  |
| Q9. What pollination services do bees provide us?                            | Pre  | 19 | 84%       | 0.09       | 0.083  | 0%   | 0%  | 16% | 84%  | 0%  |
|                                                                              | Post | 19 | 100%      | 0.00       |        | 0%   | 0%  | 0%  | 100% | 0%  |
| Q10. Why are native bee populations declining?                               | Pre  | 19 | 74%       | 0.10       | 0.083  | 0%   | 74% | 0%  | 26%  | 0%  |
|                                                                              | Post | 19 | 89%       | 0.07       |        | 0%   | 89% | 0%  | 11%  | 0%  |
| Overall average                                                              | Pre  | 19 | 64%       | 0.04       | 0.000  |      |     |     |      |     |
|                                                                              | Post | 19 | 87%       | 0.02       |        |      |     |     |      |     |

| Retrospective Self-rating - Before/Now         |        | n  | Mean | Std. Error | t-test | Poor (1) | Fair (2) | Good (3) | Very Good (4) | Excellent (5) |
|------------------------------------------------|--------|----|------|------------|--------|----------|----------|----------|---------------|---------------|
| I would rate my knowledge of native bees as... | Before | 20 | 1.65 | 0.21       | 0.000  | 60%      | 20%      | 15%      | 5%            | 0%            |
|                                                | Now    | 20 | 3.35 | 0.18       |        | 0%       | 10%      | 55%      | 25%           | 10%           |

| Retrospective Self-rating | Poor (1) | Fair (2) | Good (3) | Very Good (4) | Excellent (5) | Buffer |
|---------------------------|----------|----------|----------|---------------|---------------|--------|
| Before                    | 60%      | 20%      | 15%      | 5%            | 0%            | 80%    |
| Now                       | 0%       | 10%      | 55%      | 25%           | 10%           | 10%    |

| Participants' Feedback |                                                                                                                                            | n  | Mean | Std. Error | Strongly Disagree (1) | Disagree (2) | Neutral (3) | Agree (4) | Strongly Agree (5) |
|------------------------|--------------------------------------------------------------------------------------------------------------------------------------------|----|------|------------|-----------------------|--------------|-------------|-----------|--------------------|
|                        | 1. Informative                                                                                                                             | 19 | 4.95 | 0.05       | 0%                    | 0%           | 0%          | 5%        | 95%                |
|                        | 2. Useful                                                                                                                                  | 19 | 4.74 | 0.13       | 0%                    | 0%           | 5%          | 16%       | 79%                |
|                        | 3. Engaging                                                                                                                                | 19 | 4.26 | 0.17       | 0%                    | 0%           | 16%         | 42%       | 42%                |
|                        | Understand the importance of native bees in ecosystems and agroecosystems.                                                                 | 19 | 4.58 | 0.12       | 0%                    | 0%           | 0%          | 42%       | 58%                |
|                        | Distinguish native bees from other flower visiting insects that look like them.                                                            | 19 | 4.26 | 0.13       | 0%                    | 0%           | 5%          | 63%       | 32%                |
|                        | Identify common native bees of Central Texas with the help of the basic guides we used in this class.                                      | 19 | 4.00 | 0.15       | 0%                    | 0%           | 21%         | 58%       | 21%                |
|                        | Use this foundation of bee family taxonomy to learn more about the huge diversity of native bees on my own.                                | 19 | 4.37 | 0.16       | 0%                    | 0%           | 11%         | 42%       | 47%                |
|                        | Use best management practices to conserve native bee habitat given my knowledge of bee nesting habits, life cycles, and plant preferences. | 19 | 4.74 | 0.10       | 0%                    | 0%           | 0%          | 26%       | 74%                |
|                        | Choose the best combinations of native prairie plant species to make a native bee garden in Central Texas.                                 | 19 | 4.53 | 0.14       | 0%                    | 0%           | 5%          | 37%       | 58%                |

| Demographics |    |      |
|--------------|----|------|
| Gender       | n  | %    |
| Female       | 14 | 67%  |
| Male         | 7  | 33%  |
| Other        | 0  | 0%   |
| Total        | 21 | 100% |

| Age   | n  | %    |
|-------|----|------|
| 18-24 | 1  | 5%   |
| 25-44 | 5  | 24%  |
| 45-54 | 6  | 29%  |
| 55+   | 9  | 43%  |
| Total | 21 | 100% |

| Ethnicity                 | n  | %    |
|---------------------------|----|------|
| White                     | 21 | 100% |
| Hispanic or Latinx        | 0  | 0%   |
| Black or African American | 0  | 0%   |
| Asian/Pacific Islander    | 0  | 0%   |
| Multiracial               | 0  | 0%   |
| Other                     | 0  | 0%   |
| Total                     | 21 | 100% |

| Highest Degree      | n  | %   |
|---------------------|----|-----|
| High school degree  | 1  | 5%  |
| Associate degree    | 0  | 0%  |
| Bachelor's degree   | 10 | 48% |
| Master's degree     | 9  | 43% |
| Professional degree | 0  | 0%  |
| Doctorate           | 1  | 5%  |
| Other               | 0  | 0%  |

|                    |    |      |
|--------------------|----|------|
| Total              | 21 | 100% |
| Employment         | n  | %    |
| Employed full time | 13 | 62%  |
| Employed part-time | 1  | 5%   |
| Student            | 1  | 5%   |
| Retired            | 4  | 19%  |
| Homemaker          | 0  | 0%   |
| Self-employed      | 0  | 0%   |
| Other              | 2  | 10%  |
| Total              | 21 | 100% |

TEST RAW DATA - 2019

| Raw Data - 2019 |      |              |    |    |    |    |    |    |    |    |     |                                   |    |    |    |    |    |    |    |    |     |               |    |    |    |    |    |    |    |    |     |                                    |    |    |    |    |    |    |    |    |     |        |                                                                                                                 |         |    |   |   |
|-----------------|------|--------------|----|----|----|----|----|----|----|----|-----|-----------------------------------|----|----|----|----|----|----|----|----|-----|---------------|----|----|----|----|----|----|----|----|-----|------------------------------------|----|----|----|----|----|----|----|----|-----|--------|-----------------------------------------------------------------------------------------------------------------|---------|----|---|---|
| ID              | Name | Pre Raw Data |    |    |    |    |    |    |    |    |     | Pre (1, Correct vs. 0, Incorrect) |    |    |    |    |    |    |    |    |     | Post Raw Data |    |    |    |    |    |    |    |    |     | Post (1, Correct vs. 0, Incorrect) |    |    |    |    |    |    |    |    |     | Before | Now<br>Now, I would rate my knowledge of native bees as (1, Poor, 2, Fair, 3, Good, 4, Very Good, 5, Excellent) |         |    |   |   |
|                 |      | P1           | P2 | P3 | P4 | P5 | P6 | P7 | P8 | P9 | P10 | P1                                | P2 | P3 | P4 | P5 | P6 | P7 | P8 | P9 | P10 | P1            | P2 | P3 | P4 | P5 | P6 | P7 | P8 | P9 | P10 | P1                                 | P2 | P3 | P4 | P5 | P6 | P7 | P8 | P9 | P10 |        |                                                                                                                 | Average |    |   |   |
| 1               |      | A            | B  | B  | A  | B  | D  | B  | D  | D  | B   | 1                                 | 1  | 0  | 1  | 1  | 0  | 0  | 1  | 1  | 1   | 0%            | a  | b  | c  | a  | b  | b  | b  | d  | d   | b                                  | 1  | 1  | 1  | 1  | 1  | 1  | 0  | 1  | 1   | 1      | 1                                                                                                               | 0%      | 1  | 3 |   |
| 2               |      | a            | b  | c  | b  | b  | b  | a  | d  | d  | d   | 1                                 | 1  | 1  | 0  | 1  | 1  | 0  | 1  | 1  | 0   | 6%            | a  | a  | c  | a  | b  | b  | d  | d  | d   | b                                  | 1  | 0  | 1  | 1  | 1  | 1  | 1  | 1  | 1   | 1      | 1                                                                                                               | 1       | 8% | 3 | 4 |
| 3               |      | a            | b  | c  | c  | a  | c  | b  | d  | d  | b   | 1                                 | 1  | 1  | 0  | 0  | 0  | 0  | 1  | 1  | 1   | 4%            | a  | b  | c  | d  | a  | b  | d  | d  | d   | b                                  | 1  | 1  | 1  | 0  | 0  | 1  | 1  | 1  | 1   | 1      | 1                                                                                                               | 1       | 8% | 1 | 4 |
| 4               |      | a            | a  | b  | d  | b  | c  | d  | c  | c  | b   | 1                                 | 0  | 0  | 0  | 1  | 0  | 1  | 0  | 0  | 1   | 3%            | a  | a  | c  | d  | b  | b  | d  | d  | d   | b                                  | 1  | 0  | 1  | 0  | 1  | 1  | 1  | 1  | 1   | 1      | 1                                                                                                               | 1       | 9% | 1 | 3 |
| 5               |      | a            | b  | b  | b  | a  | a  | b  | b  | c  | b   | 1                                 | 1  | 0  | 0  | 0  | 0  | 0  | 0  | 0  | 1   | 8%            | a  | b  | c  | a  | b  | b  | b  | d  | d   | b                                  | 1  | 1  | 1  | 1  | 1  | 1  | 0  | 1  | 1   | 1      | 1                                                                                                               | 1       | 7% | 2 | 3 |
| 6               |      | a            | b  | c  | a  | a  | d  | d  | d  | d  | b   | 1                                 | 1  | 1  | 1  | 0  | 0  | 1  | 1  | 1  | 1   | 4%            | a  | a  | b  | a  | a  | b  | d  | d  | d   | b                                  | 1  | 0  | 0  | 1  | 0  | 1  | 1  | 1  | 1   | 1      | 1                                                                                                               | 1       | 9% | 1 | 3 |
| 7               |      | a            | a  | b  | c  | a  | d  | b  | d  | d  | b   | 1                                 | 0  | 0  | 0  | 0  | 0  | 0  | 1  | 1  | 1   | 4%            | a  | a  | c  | a  | b  | b  | d  | d  | d   | b                                  | 1  | 0  | 1  | 1  | 1  | 1  | 1  | 1  | 1   | 1      | 1                                                                                                               | 1       | 8% | 1 | 2 |
| 8               |      | a            | b  | c  | b  | a  | d  | e  | b  | c  | b   | 1                                 | 1  | 1  | 0  | 0  | 0  | 0  | 0  | 0  | 1   | 9%            | a  | b  | a  | a  | b  | a  | d  | d  | d   | b                                  | 1  | 1  | 0  | 1  | 1  | 0  | 1  | 1  | 1   | 1      | 1                                                                                                               | 1       | 9% | 1 | 3 |
| 9               |      | A            | B  | C  | A  | B  | B  | B  | D  | D  | B   | 1                                 | 1  | 1  | 1  | 1  | 1  | 0  | 1  | 1  | 1   | 0%            | a  | b  | a  | a  | b  | b  | d  | d  | d   | b                                  | 1  | 1  | 0  | 1  | 1  | 1  | 1  | 1  | 1   | 1      | 1                                                                                                               | 1       | 0% | 3 | 3 |

NATIVE BEES OF TEXAS COURSE – TEST AND FEEDBACK - 2019

[illegible]

NATIVE BEES OF TEXAS COURSE – TEST AND FEEDBACK - 2019

## TEST RAW DATA – 2019

[illegible]

FEEDBACK FORM – COURSE RATINGS – LEARNING – APPLICATION – BEST ASPECTS – IMPROVEMENTS -- RAW DATA - 2019

| ID | To what extent was the class... |           |             | As a result of today's workshop, I am better able to...                    |                                                                                   |                                                                                                         |                                                                                                               |                                                                                                                                              |                                                                                                             | Open-ended responses                                                                                          |                                                                                                                                           |                                                                 |
|----|---------------------------------|-----------|-------------|----------------------------------------------------------------------------|-----------------------------------------------------------------------------------|---------------------------------------------------------------------------------------------------------|---------------------------------------------------------------------------------------------------------------|----------------------------------------------------------------------------------------------------------------------------------------------|-------------------------------------------------------------------------------------------------------------|---------------------------------------------------------------------------------------------------------------|-------------------------------------------------------------------------------------------------------------------------------------------|-----------------------------------------------------------------|
|    | 1. Informative                  | 2. Useful | 3. Engaging | 4. Understand the importance of native bees in ecosystems & argoecosystems | 5. Distinguish native bees from other flower visiting insects that look like them | 6. Identify common native bees of Central Texas with the help of the basic guides we used in this class | 7. Use this foundation of bee family taxonomy to learn more about the huge diversity of native bees on my own | 8. Use best management practices to conserve native bee habitat given my knowledge of bee nesting habits, life cycles, and plant preferences | 9. Choose the best combinations of native prairie plan species to make a native bee garden in Central Texas | 10. Describe how you intend to use skills/knowledge that you learned in today's session in your practice/home | 11. The best part of this event was/were Everything; it was great!                                                                        | 12. This event could be improved by N/A                         |
| 1  | 5                               | 4         | 4           | 5                                                                          | 3                                                                                 | 4                                                                                                       | 4                                                                                                             | 5                                                                                                                                            | 5                                                                                                           | Home landscaping & continue efforts with Texas Master naturalists                                             |                                                                                                                                           |                                                                 |
| 2  | 5                               | 5         | 3           | 5                                                                          | 4                                                                                 | 4                                                                                                       | 4                                                                                                             | 4                                                                                                                                            | 4                                                                                                           | Building habitat at our home                                                                                  | Bee observations under the microscope                                                                                                     | N/A                                                             |
| 3  | 5                               | 5         | 5           | 4                                                                          | 4                                                                                 | 4                                                                                                       | 4                                                                                                             | 5                                                                                                                                            | 3                                                                                                           |                                                                                                               | The labs                                                                                                                                  | not reading slides word for word                                |
| 4  | 4                               | 3         | 3           | 4                                                                          | 4                                                                                 | 3                                                                                                       | 3                                                                                                             | 4                                                                                                                                            | 4                                                                                                           |                                                                                                               | All the good info                                                                                                                         |                                                                 |
| 5  | 5                               | 5         | 4           | 5                                                                          | 4                                                                                 | 4                                                                                                       | 5                                                                                                             | 5                                                                                                                                            | 5                                                                                                           | ID Photo project I've been 40 years range science student & reestablishment of native grasses                 |                                                                                                                                           | more field time                                                 |
| 6  | 5                               | 5         | 3           | 4                                                                          | 5                                                                                 | 5                                                                                                       | 5                                                                                                             | 5                                                                                                                                            | 5                                                                                                           | 'Share knowledge' maybe plant some flowers                                                                    | bee-actual bees                                                                                                                           |                                                                 |
| 7  | 5                               | 5         | 4           | 5                                                                          | 4                                                                                 | 3                                                                                                       | 4                                                                                                             | 4                                                                                                                                            | 4                                                                                                           | Lawn and garden care and development                                                                          | Learning about Bees! I found I knew nothing before                                                                                        |                                                                 |
| 8  | 5                               | 5         | 5           | 5                                                                          | 4                                                                                 | 4                                                                                                       | 5                                                                                                             | 5                                                                                                                                            | 5                                                                                                           |                                                                                                               | knowing about all the types of sizes of bees! So much! Learning how to distinguish bees from flies/wasps; learning how to provide habitat |                                                                 |
| 9  | 5                               | 5         | 5           | 5                                                                          | 4                                                                                 | 3                                                                                                       | 4                                                                                                             | 5                                                                                                                                            | 5                                                                                                           | increase native prairie & bee friendly wildflowers on my ranch                                                |                                                                                                                                           | labeling the bees in the scopes or telling us the answers later |

|   |   |   |   |   |   |   |   |   |   |                                                                                                          |                                                                                                                                                                     |                                                    |
|---|---|---|---|---|---|---|---|---|---|----------------------------------------------------------------------------------------------------------|---------------------------------------------------------------------------------------------------------------------------------------------------------------------|----------------------------------------------------|
| 1 |   |   |   |   |   |   |   |   |   | As a master gardener, I teach an intro to native been class as well as a pollinator/insect habitat class | Seeing actual bees under scopes and learning how to better teach this topic. Thought it was great                                                                   |                                                    |
| 0 | 5 | 5 | 5 | 4 | 5 | 4 | 5 | 5 | 5 | By creating a pollinator garden                                                                          | Both lectures and lab complemented the learning process)                                                                                                            |                                                    |
| 1 |   |   |   |   |   |   |   |   |   | Lang management/pollinators; presentation background for garden clubs & master gardeners                 |                                                                                                                                                                     | Longer time involvement; fall day (better weather) |
| 1 | 5 | 4 | 4 | 5 | 4 | 4 | 3 | 4 | 5 |                                                                                                          |                                                                                                                                                                     |                                                    |
| 2 | 5 | 5 | 5 | 5 | 5 | 5 | 5 | 5 | 5 | all of it                                                                                                |                                                                                                                                                                     |                                                    |
| 1 |   |   |   |   |   |   |   |   |   |                                                                                                          |                                                                                                                                                                     |                                                    |
| 3 | 5 | 4 | 5 | 5 | 4 | 4 | 4 | 4 | 4 | Bee labs                                                                                                 |                                                                                                                                                                     |                                                    |
| 1 |   |   |   |   |   |   |   |   |   | Identify what I have and plan to improve habitat                                                         | bee examples and excellent instructor                                                                                                                               | warmer room warmer room and set lunch              |
| 4 | 5 | 5 | 4 | 4 | 5 | 4 | 5 | 5 | 4 |                                                                                                          |                                                                                                                                                                     |                                                    |
| 1 | 5 | 5 | 4 | 5 | 5 | 5 | 4 | 5 | 4 | Plant bee-friendly plants                                                                                | excellent instructor!                                                                                                                                               | break                                              |
| 1 |   |   |   |   |   |   |   |   |   | I'll try to grow as much as I can from an apartment                                                      | Learning on bee behavior to be able to understand native bees and realize they are mostly solitary. [I realize that you] don't need honey bees to improve ecosystem | Include lunch                                      |
| 6 | 5 | 5 | 5 | 5 | 5 | 5 | 5 | 5 | 4 |                                                                                                          |                                                                                                                                                                     |                                                    |
| 1 |   |   |   |   |   |   |   |   |   | Increase flowers for native meadows                                                                      | Documenting; increasing number & variety of bees at the ranch                                                                                                       | I could use less details about metamorphosis       |
| 7 | 5 | 5 | 5 | 4 | 4 | 4 | 4 | 5 | 5 |                                                                                                          |                                                                                                                                                                     |                                                    |
| 1 |   |   |   |   |   |   |   |   |   |                                                                                                          |                                                                                                                                                                     |                                                    |
| 8 | 5 | 5 | 4 | 4 | 4 | 3 | 5 | 5 | 5 | I am converting our front & back yard to pollinator gardens                                              | handouts/sliders                                                                                                                                                    | longer, slower pace                                |
| 1 | 5 | 5 | 4 | 4 | 4 | 4 | 5 | 5 | 5 |                                                                                                          |                                                                                                                                                                     |                                                    |
| 2 |   |   |   |   |   |   |   |   |   |                                                                                                          |                                                                                                                                                                     |                                                    |
| 0 |   |   |   |   |   |   |   |   |   |                                                                                                          |                                                                                                                                                                     |                                                    |
| 2 |   |   |   |   |   |   |   |   |   |                                                                                                          |                                                                                                                                                                     |                                                    |
| 1 |   |   |   |   |   |   |   |   |   |                                                                                                          |                                                                                                                                                                     |                                                    |

## SUMMARY FEEDBACK FORM 2019

|        |      |      |      |      |      |      |      |      |      |
|--------|------|------|------|------|------|------|------|------|------|
| n      | 19   | 19   | 19   | 19   | 19   | 19   | 19   | 19   | 19   |
| mean   | 4.95 | 4.74 | 4.26 | 4.58 | 4.26 | 4.00 | 4.37 | 4.74 | 4.53 |
| 1      | 0%   | 0%   | 0%   | 0%   | 0%   | 0%   | 0%   | 0%   | 0%   |
| 2      | 0%   | 0%   | 0%   | 0%   | 0%   | 0%   | 0%   | 0%   | 0%   |
| 3      | 0%   | 5%   | 16%  | 0%   | 5%   | 21%  | 11%  | 0%   | 5%   |
| 4      | 5%   | 16%  | 42%  | 42%  | 63%  | 58%  | 42%  | 26%  | 37%  |
| 5      | 95%  | 79%  | 42%  | 58%  | 32%  | 21%  | 47%  | 74%  | 58%  |
|        | 100  | 100  | 100  |      |      |      |      | 100  | 100  |
|        | %    | %    | %    | 100% | 100% | 100% | 100% | %    | %    |
| stddev | 0.23 | 0.56 | 0.73 | 0.51 | 0.56 | 0.67 | 0.68 | 0.45 | 0.61 |
| stderr |      |      |      |      |      |      |      |      |      |
| or     | 0.05 | 0.13 | 0.17 | 0.12 | 0.13 | 0.15 | 0.16 | 0.10 | 0.14 |

## INTENDED USE OF ACQUIRED KNOWLEDGE – DATA - 2019

|                     |                                                                                                                |
|---------------------|----------------------------------------------------------------------------------------------------------------|
| f                   | 10. Describe how you intend to use skills/knowledge that you learned in today's session in your practice/home: |
| Educate Other       | As a master gardener, I teach an intro to native been class as well as a pollinator/insect habitat class       |
| Educate Other       | continue efforts with Texas Master naturalists                                                                 |
| Educate Other       | Share knowledge' maybe plant some flowers                                                                      |
| Educate Other       | presentation background for garden clubs and master gardeners                                                  |
| Improve Garden/Land | Building habitat at our home                                                                                   |
| Improve Garden/Land | By creating a pollinator garden                                                                                |
| Improve Garden/Land | Documenting; increasing number nad variety of bees at the ranch                                                |
| Improve Garden/Land | Home landscaping                                                                                               |
| Improve Garden/Land | I am converting our front and back yard to pollinator gardens                                                  |
| Improve Garden/Land | Identify what I have and plan to improve habitat                                                               |
| Improve Garden/Land | I'll try to grow as much as I can from an apartment                                                            |
| Improve Garden/Land | Increase flowers for native meadows                                                                            |
| Improve Garden/Land | increase native prairie and bee friendly wildflowers on my ranch                                               |
| Improve Garden/Land | I've been a ranger for 40 years and continue to work to reestablish native grasses                             |
| Improve Garden/Land | Lang management/pollinators                                                                                    |
| Improve Garden/Land | Lawn and garden care and development                                                                           |
| Improve Garden/Land | Plant bee-friendly plants                                                                                      |
| Project             | ID Photo project                                                                                               |

NEEDS IMPROVEMENT – DATA - 2019

| Category             | Response                                                                                                                                            |
|----------------------|-----------------------------------------------------------------------------------------------------------------------------------------------------|
| Lunch                | Include lunch<br>Set lunch break                                                                                                                    |
| Duration and Pace    | Longer time involvement<br>longer, slower pace<br>more field time<br>N/A<br>N/A                                                                     |
| More active learning | not reading slides word for word<br>I could use less details about metamorphosis<br>labeling the bees in the scopes or telling us the answers later |
| Climate              | warmer room<br>warmer room and set lunch break<br>Better weather                                                                                    |

BEST ASPECTS OF COURSE – DATA - 2019

| Category            | Response                                                                                                                                   |
|---------------------|--------------------------------------------------------------------------------------------------------------------------------------------|
| General-positive    | Everything; it was great!                                                                                                                  |
| General-positive    | all of it                                                                                                                                  |
| Information         | All the good info                                                                                                                          |
| Information         | Learning about Bees! I found I knew nothing before.                                                                                        |
| Information         | knowing about all the types of sizes of bees!                                                                                              |
| Information         | so much! Learning how to distinguish bees from flies/wasps; learning how to provide habitat                                                |
| Information         | Learning on bee behavior                                                                                                                   |
| Information         | to be able to understand native bees and realize they are mostly solitary. [I realize that you] don't need honey bees to improve ecosystem |
| Instruction         | Both lectures and lab complemented the learning process)                                                                                   |
| Instruction         | bee examples and excellent instructor                                                                                                      |
| Instruction         | excellent instructor!                                                                                                                      |
| Lab and Garden Walk | bee-actual bees                                                                                                                            |
| Microscope Lab      | Bee observations under the microscope                                                                                                      |
| Microscope Lab      | The labs                                                                                                                                   |
| Microscope Lab      | Seeing actual bees under scopes and learning how to better teach this topic. Thought it was great                                          |

Microscope Lab

Bee labs

Resources

handouts/sliders

## DEMOGRAPHICS DATA - 2019

| D  | Name | Gender | Age   | Ethnicity | Highest degree or level of school completed? | Employment status | Occupation | Zip code | Notes                                                                                                                  |
|----|------|--------|-------|-----------|----------------------------------------------|-------------------|------------|----------|------------------------------------------------------------------------------------------------------------------------|
| 1  |      | f      | 45-54 | w         | ma                                           | full time         |            | 78641    |                                                                                                                        |
| 2  |      | f      | 55+   | w         | bac                                          | retired           |            | 78723    |                                                                                                                        |
| 3  |      | f      | 25-44 | w         | bac                                          | Other             |            | 78615    |                                                                                                                        |
| 4  |      | f      | 45-54 | w         | ma                                           | full time         |            | 78676    |                                                                                                                        |
| 5  |      | f      | 55+   | w         | ma                                           | full time         |            | 76825    |                                                                                                                        |
| 6  |      | m      | 55+   | w         | ma                                           | retired           |            | 78633    |                                                                                                                        |
| 7  |      | m      | 55+   | w         | bac                                          | full time         |            | 78676    |                                                                                                                        |
| 8  |      | m      | 25-44 | w         | bac                                          | full time         |            | 78626    | acquired information via web & personal communication at workshop                                                      |
| 9  |      | f      | 55+   | w         | bac                                          | full time         |            | 78628    | acquired via LinkedIn                                                                                                  |
| 10 |      | m      | 55+   | w         | doctorate                                    | retired           |            | 78130    |                                                                                                                        |
| 11 |      | m      | 18-24 | w         | high                                         | student           |            | 78705    | enrolled at UT Austin FRI bugs research stream; wanted to learn more about insects without taking a formal class at UT |
| 12 |      | f      | 25-44 | w         | ma                                           | full time         |            | 78749    |                                                                                                                        |
| 13 |      | f      | 45-54 | w         | ma                                           | full time         |            | 78633    |                                                                                                                        |
| 14 |      | m      | 45-54 | w         | bac                                          | retired           |            | 78628    |                                                                                                                        |
| 15 |      | f      | 55+   | w         | ma                                           | part time         |            | 78610    |                                                                                                                        |
| 16 |      | f      | 25-44 | w         | bac                                          | full time         |            | 78751    |                                                                                                                        |
| 17 |      | m      | 25-44 | w         | ma                                           | Other             |            | 78615    |                                                                                                                        |
| 18 |      | f      | 45-54 | w         | bac                                          | full time         |            | 78666    |                                                                                                                        |
| 19 |      | f      | 45-54 | w         | bac                                          | full time         |            | 78628    |                                                                                                                        |
| 20 |      | f      | 55+   | w         | ma                                           | full time         |            | 78660    |                                                                                                                        |
| 21 |      | f      | 55+   | w         | bac                                          | full time         |            | 78626    | acquired information via web & personal communication at workshop                                                      |

# NATIVE BEES OF TEXAS COURSE – TEST AND FEEDBACK - 2019

|         |      |      |      |      |      |       |    |
|---------|------|------|------|------|------|-------|----|
| n       | 21   | 21   | 21   | 21   | 21   | 1     | 21 |
| f       | 67%  | 0%   | 0%   | 0%   | 0%   | #REF! | 0% |
| m       | 33%  | 0%   | 0%   | 0%   | 0%   |       |    |
| 18-24   |      | 5%   | 0%   | 0%   | 0%   |       |    |
| 25-44   |      | 24%  | 0%   | 0%   | 0%   |       |    |
| 45-54   |      | 29%  | 0%   | 0%   | 0%   |       |    |
| 55+     |      | 43%  | 0%   | 0%   | 0%   |       |    |
| w       |      | 0%   | 100% | 0%   | 0%   |       |    |
| high    |      |      |      | 5%   | 0%   |       |    |
| bac     |      |      |      | 48%  | 0%   |       |    |
| ma      |      |      |      | 43%  | 0%   |       |    |
| doctor  |      |      |      |      |      |       |    |
| ate     |      |      |      | 5%   | 0%   |       |    |
| full    |      |      |      |      |      |       |    |
| time    |      |      |      |      | 62%  |       |    |
| part    |      |      |      |      |      |       |    |
| time    |      |      |      |      | 5%   |       |    |
| retired |      |      |      |      | 19%  |       |    |
| studen  |      |      |      |      |      |       |    |
| t       |      |      |      |      | 5%   |       |    |
| Other   |      |      |      |      | 10%  |       |    |
|         | 100% | 100% | 100% | 100% | 100% | #REF! | 0% |

| Row Labels         | Count of Zip code |
|--------------------|-------------------|
| 76825              | 1                 |
| 78130              | 1                 |
| 78610              | 1                 |
| 78615              | 2                 |
| 78626              | 2                 |
| 78628              | 3                 |
| 78633              | 2                 |
| 78641              | 1                 |
| 78660              | 1                 |
| 78666              | 1                 |
| 78676              | 2                 |
| 78705              | 1                 |
| 78723              | 1                 |
| 78749              | 1                 |
| 78751              | 1                 |
| <b>Grand Total</b> | <b>21</b>         |

MAP ZIP CODES

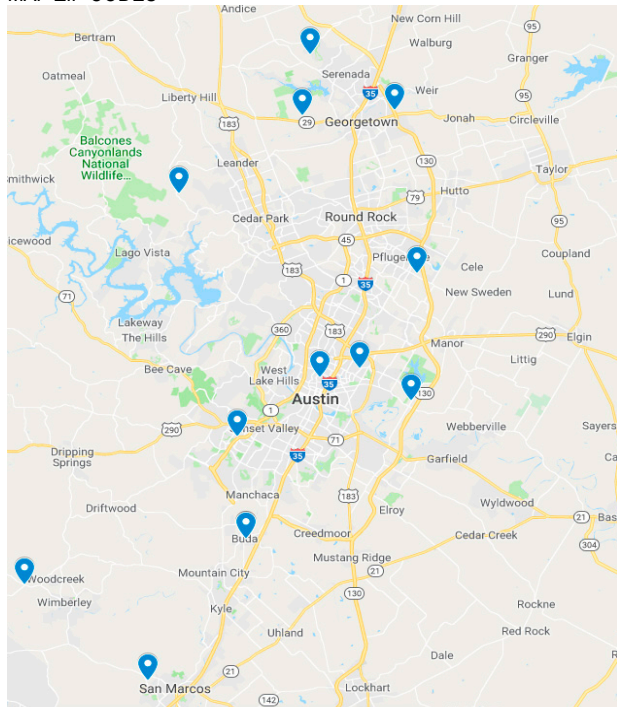

Supplement: s1 [file s1]
