# Supplementary material for: The Native Bees of Texas: Evaluating the Benefits of a Public Engagement Course
Source: MDPI journal article supplement (doi:10.3390/insects12080702), 2021-08-05
Supplement: s1 [file s1]

SUMMARY TABLE - TEST RESULTS

data

40

42

53

43

44

45

46

47

48

c  
q  
d  
r  
e  
s  
f  
t  
g  
u  
h  
v  
i  
w  
j  
x  
k  
y  
l  
z  
m  
aa

|                                                                                  |      | n  | % Correct | Std. error | p-value | a    | b   | c   | d    | e   | Blank |
|----------------------------------------------------------------------------------|------|----|-----------|------------|---------|------|-----|-----|------|-----|-------|
| Q1. Fly and bee. Which is the fly?                                               | Pre  | 11 | 73%       | 0.14       | 0.303   | 73%  | 27% |     |      |     | 0%    |
|                                                                                  | Post | 11 | 91%       | 0.09       |         | 91%  | 0%  |     |      |     | 9%    |
| Q2. Wasp and bee. Which is the wasp?                                             | Pre  | 11 | 73%       | 0.14       | 1.000   | 27%  | 73% |     |      |     | 0%    |
|                                                                                  | Post | 11 | 73%       | 0.14       |         | 27%  | 73% |     |      |     | 0%    |
| Q3. Bee and flies. Which is the bee?                                             | Pre  | 11 | 36%       | 0.15       | 0.102   | 18%  | 45% | 36% | 0%   |     | 0%    |
|                                                                                  | Post | 11 | 73%       | 0.14       |         | 18%  | 0%  | 73% | 0%   |     | 9%    |
| Q4. Bees. Which are honey bees?                                                  | Pre  | 11 | 55%       | 0.16       | 0.193   | 55%  | 0%  | 36% | 9%   |     | 0%    |
|                                                                                  | Post | 11 | 82%       | 0.12       |         | 82%  | 0%  | 0%  | 18%  |     | 0%    |
| Q5. What sex is this leafcutter bee?                                             | Pre  | 11 | 45%       | 0.16       | 0.028   | 55%  | 45% |     |      |     | 0%    |
|                                                                                  | Post | 11 | 91%       | 0.09       |         | 9%   | 91% |     |      |     | 0%    |
| Q6. Why are bees important for ecosystem functions?                              | Pre  | 11 | 55%       | 0.16       | 0.408   | 45%  | 0%  | 0%  | 55%  | 0%  | 0%    |
|                                                                                  | Post | 11 | 73%       | 0.14       |         | 27%  | 0%  | 0%  | 73%  | 0%  | 0%    |
| Q7. What pollination services do bees provide us?                                | Pre  | 11 | 55%       | 0.16       | 0.015   | 36%  | 0%  | 0%  | 55%  | 9%  | 0%    |
|                                                                                  | Post | 11 | 100%      | 0.00       |         | 0%   | 0%  | 0%  | 100% | 0%  | 0%    |
| Q8. Where do most native bees' nest?                                             | Pre  | 11 | 64%       | 0.15       | 0.035   | 64%  | 18% | 9%  | 9%   | 0%  | 0%    |
|                                                                                  | Post | 11 | 100%      | 0.00       |         | 100% | 0%  | 0%  | 0%   | 0%  | 0%    |
| Q9. What features can help me distinguish a bee from a fly or wasp in my garden? | Pre  | 11 | 55%       | 0.16       | 0.068   | 9%   | 18% | 0%  | 55%  | 18% | 0%    |
|                                                                                  | Post | 11 | 91%       | 0.09       |         | 0%   | 0%  | 0%  | 91%  | 9%  | 0%    |
| Q10. Why are native bee populations declining?                                   | Pre  | 11 | 91%       | 0.09       | 0.363   | 91%  | 0%  | 0%  | 9%   |     | 0%    |
|                                                                                  | Post | 11 | 100%      | 0.00       |         | 100% | 0%  | 0%  | 0%   |     | 0%    |
| Overall                                                                          | Pre  | 11 | 60%       | 0.05       | 0.009   |      |     |     |      |     |       |
|                                                                                  | Post | 11 | 87%       | 0.03       |         |      |     |     |      |     |       |

100% 0%  
 100% 0%  
 100% 0%  
 100% 0%  
 100% 0%  
 100%  
 100%  
 100%  
 100%  
 100%  
 100%  
 100%  
 100%  
 100%  
 100%

SUMMARY TABLE - TEST RESULTS

| Pre       |      |      |      |      |      |      |      |      |      |      |         | Post      |      |      |      |      |      |      |      |      |      |      |         |
|-----------|------|------|------|------|------|------|------|------|------|------|---------|-----------|------|------|------|------|------|------|------|------|------|------|---------|
| n         | 11   | 11   | 11   | 11   | 11   | 11   | 11   | 11   | 11   | 11   | 11      | n         | 11   | 11   | 11   | 11   | 11   | 11   | 11   | 11   | 11   | 11   |         |
| Question  | 1    | 2    | 3    | 4    | 5    | 6    | 7    | 8    | 9    | 10   | average | Question  | 1    | 2    | 3    | 4    | 5    | 6    | 7    | 8    | 9    | 10   | average |
| % correct | 73%  | 73%  | 36%  | 55%  | 45%  | 55%  | 55%  | 64%  | 55%  | 91%  | 60%     | % correct | 91%  | 73%  | 73%  | 82%  | 91%  | 73%  | 100% | 100% | 91%  | 100% | 87%     |
| a         | 0.73 | 0.27 | 0.18 | 0.55 | 0.55 | 0.45 | 0.36 | 0.64 | 0.09 | 0.91 |         | a         | 0.91 | 0.27 | 0.18 | 0.82 | 0.09 | 0.27 | 0.00 | 1.00 | 0.00 | 1.00 |         |
| b         | 0.27 | 0.73 | 0.45 | 0.00 | 0.45 | 0.00 | 0.00 | 0.18 | 0.18 | 0.00 |         | b         | 0.00 | 0.73 | 0.00 | 0.00 | 0.91 | 0.00 | 0.00 | 0.00 | 0.00 | 0.00 |         |
| c         | 0.00 | 0.00 | 0.36 | 0.36 | 0.00 | 0.00 | 0.00 | 0.09 | 0.00 | 0.00 |         | c         | 0.00 | 0.00 | 0.73 | 0.00 | 0.00 | 0.00 | 0.00 | 0.00 | 0.00 | 0.00 |         |
| d         | 0.00 | 0.00 | 0.00 | 0.09 | 0.00 | 0.55 | 0.55 | 0.09 | 0.55 | 0.09 |         | d         | 0.00 | 0.00 | 0.00 | 0.18 | 0.00 | 0.73 | 1.00 | 0.00 | 0.91 | 0.00 |         |
| e         | 0.00 | 0.00 | 0.00 | 0.00 | 0.00 | 0.00 | 0.09 | 0.00 | 0.18 | 0.00 |         | e         | 0.00 | 0.00 | 0.00 | 0.00 | 0.00 | 0.00 | 0.00 | 0.00 | 0.09 | 0.00 |         |
| blank     | 0.00 | 0.00 | 0.00 | 0.00 | 0.00 | 0.00 | 0.00 | 0.00 | 0.00 | 0.00 |         | blank     | 0.09 | 0.00 | 0.09 | 0.00 | 0.00 | 0.00 | 0.00 | 0.00 | 0.00 | 0.00 |         |
| sum       | 1    | 1    | 1    | 1    | 1    | 1    | 1    | 1    | 1    | 1    |         | sum       | 1    | 1    | 1    | 1    | 1    | 1    | 1    | 1    | 1    | 1    |         |
| std dev   | 0.47 | 0.47 | 0.50 | 0.52 | 0.52 | 0.52 | 0.52 | 0.50 | 0.52 | 0.30 | 0.18    | std dev   | 0.30 | 0.47 | 0.47 | 0.40 | 0.30 | 0.47 | 0.00 | 0.00 | 0.30 | 0.00 | 0.11    |
| std error | 0.14 | 0.14 | 0.15 | 0.16 | 0.16 | 0.16 | 0.16 | 0.15 | 0.16 | 0.09 | 0.05    | std error | 0.09 | 0.14 | 0.14 | 0.12 | 0.09 | 0.14 | 0.00 | 0.00 | 0.09 | 0.00 | 0.03    |

SUMMARY TABLE - FEEDBACK - COURSE RATINGS, LEARNING

|   |                                                                                                                 | 23 | 24   | 33   | 26                    | 27           | 28          | 29        | 30                 | 208 |     |     |
|---|-----------------------------------------------------------------------------------------------------------------|----|------|------|-----------------------|--------------|-------------|-----------|--------------------|-----|-----|-----|
|   |                                                                                                                 | n  | Mean | SE   | Strongly Disagree (1) | Disagree (2) | Neutral (3) | Agree (4) | Strongly Agree (5) |     | %   | %   |
| b | Informative                                                                                                     | 11 | 5.00 | 0.00 | 0                     | 0            | 0           | 0         | 100                |     | 100 | 100 |
| c | Useful                                                                                                          | 11 | 5.00 | 0.00 | 0                     | 0            | 0           | 0         | 100                |     | 100 | 100 |
| d | Engaged                                                                                                         | 11 | 5.00 | 0.00 | 0                     | 0            | 0           | 0         | 100                |     | 100 | 100 |
| e | Explain the importance of native bees in ecosystems and agroecosystems                                          | 12 | 4.75 | 0.13 | 0                     | 0            | 0           | 25        | 75                 |     | 100 | 100 |
| f | Distinguish native bees from flying visitors that look like them                                                | 12 | 4.50 | 0.15 | 0                     | 0            | 0           | 50        | 50                 |     | 100 | 100 |
| g | Use basic guide to ID the common native bees in Texas gardens, parks, or wildlands                              | 12 | 4.33 | 0.14 | 0                     | 0            | 0           | 67        | 33                 |     | 100 | 100 |
| h | Use my foundation of bee classification to learn more about native bee diversity                                | 12 | 4.33 | 0.14 | 0                     | 0            | 0           | 67        | 33                 |     | 100 | 100 |
| i | Describe management practices to conserve native bee habitats given my knowledge of their nesting habits & diet | 12 | 4.50 | 0.15 | 0                     | 0            | 0           | 50        | 50                 |     | 100 | 100 |
| j | Identify native prairie plants for native bees in Central Texas                                                 | 12 | 4.25 | 0.18 | 0                     | 0            | 8           | 58        | 33                 |     | 100 | 92  |

SUMMARY TABLE - COURSE RATINGS

|           |      |      |      |      |      |      |      |      |      |
|-----------|------|------|------|------|------|------|------|------|------|
| n         | 11   | 11   | 11   | 12   | 12   | 12   | 12   | 12   | 12   |
| mean      | 5.00 | 5.00 | 5.00 | 4.75 | 4.50 | 4.33 | 4.33 | 4.50 | 4.25 |
| 1         | 0%   | 0%   | 0%   | 0%   | 0%   | 0%   | 0%   | 0%   | 0%   |
| 2         | 0%   | 0%   | 0%   | 0%   | 0%   | 0%   | 0%   | 0%   | 0%   |
| 3         | 0%   | 0%   | 0%   | 0%   | 0%   | 0%   | 0%   | 0%   | 8%   |
| 4         | 0%   | 0%   | 0%   | 25%  | 50%  | 67%  | 67%  | 50%  | 58%  |
| 5         | 100% | 100% | 100% | 75%  | 50%  | 33%  | 33%  | 50%  | 33%  |
| std dev   | 0.00 | 0.00 | 0.00 | 0.45 | 0.52 | 0.49 | 0.49 | 0.52 | 0.62 |
| std error | 0.00 | 0.00 | 0.00 | 0.13 | 0.15 | 0.14 | 0.14 | 0.15 | 0.18 |
| Total     | 100% | 100% | 100% | 100% | 100% | 100% | 100% | 100% | 100% |

NATIVE BEES OF TEXAS COURSE – FEEDBACK - 2018

### TEST AND FEEDBACK PER PARTICIPANT (BEE NAMES = De-Identified)

[illegible]

# NATIVE BEES OF TEXAS COURSE – FEEDBACK - 2018

|               |            |   |   |   |   |   |   |   |   |   |   |   |   |   |   |   |   |   |   |   |   |   |     |               |            |   |   |   |   |   |   |   |   |   |   |                 |            |   |   |   |   |   |   |   |   |   |   |     |  |  |  |  |  |  |  |  |  |  |  |  |  |  |  |  |  |  |  |  |  |  |  |  |  |  |  |  |  |  |  |  |  |  |  |  |  |  |  |  |  |  |  |  |  |  |  |  |  |  |  |  |  |  |  |  |  |  |  |  |  |  |  |  |  |  |  |  |  |  |  |  |  |  |  |  |  |  |  |  |  |  |  |  |  |  |  |  |  |  |  |  |  |  |  |  |  |  |  |  |  |  |  |  |  |  |  |  |  |  |  |  |  |  |  |  |  |  |  |  |  |  |  |  |  |  |  |  |  |  |  |  |  |  |  |  |  |  |  |  |  |  |  |  |  |  |  |  |  |  |  |  |  |  |  |  |  |  |  |  |  |  |  |  |  |  |  |  |  |  |  |  |  |  |  |  |  |  |  |  |  |  |  |  |  |  |  |  |  |  |  |  |  |  |  |  |  |  |  |  |  |  |  |  |  |  |  |  |  |  |  |  |  |  |  |  |  |  |  |  |  |  |  |  |  |  |  |  |  |  |  |  |  |  |  |  |  |  |  |  |  |  |  |  |  |  |  |  |  |  |  |  |  |  |  |  |  |  |  |  |  |  |  |  |  |  |  |  |  |  |  |  |  |  |  |  |  |  |  |  |  |  |  |  |  |  |  |  |  |  |  |  |  |  |  |  |  |  |  |  |  |  |  |  |  |  |  |  |  |  |  |  |  |  |  |  |  |  |  |  |  |  |  |  |  |  |  |  |  |  |  |  |  |  |  |  |  |  |  |  |  |  |  |  |  |  |  |  |  |  |  |  |  |  |  |  |  |  |  |  |  |  |  |  |  |  |  |  |  |  |  |  |  |  |  |  |  |  |  |  |  |  |  |  |  |  |  |  |  |  |  |  |  |  |  |  |  |  |  |  |  |  |  |  |  |  |  |  |  |  |  |  |  |  |  |  |  |  |  |  |  |  |  |  |  |  |  |  |  |  |  |  |  |  |  |  |  |  |  |  |  |  |  |  |  |  |  |  |  |  |  |  |  |  |  |  |  |  |  |  |  |  |  |  |  |  |  |  |  |  |  |  |  |  |  |  |  |  |  |  |  |  |  |  |  |  |  |  |  |  |  |  |  |  |  |  |  |  |  |  |  |  |  |  |  |  |  |  |  |  |  |  |  |  |  |  |  |  |  |  |  |  |  |  |  |  |  |  |  |  |  |  |  |  |  |  |  |  |  |  |  |  |  |  |  |  |  |  |  |  |  |  |  |  |  |  |  |  |  |  |  |  |  |  |  |  |  |  |  |  |  |  |  |  |  |  |  |  |  |  |  |  |  |  |  |  |  |  |  |  |  |  |  |  |  |  |  |  |  |  |  |  |  |  |  |  |  |  |  |  |  |  |  |  |  |  |  |  |  |  |  |  |  |  |  |  |  |  |  |  |  |  |  |  |  |  |  |  |  |  |  |  |  |  |  |  |  |  |  |  |  |  |  |  |  |  |  |  |  |  |  |  |  |  |  |  |  |  |  |  |  |  |  |  |  |  |  |  |  |  |  |  |  |  |  |  |  |  |  |  |  |  |  |  |  |  |  |  |  |  |  |  |  |  |  |  |  |  |  |  |  |  |  |  |  |  |  |  |  |  |  |  |  |  |  |  |  |  |  |  |  |  |  |  |  |  |  |  |  |  |  |  |  |  |  |  |  |  |  |  |  |  |  |  |  |  |  |  |  |  |  |  |  |  |  |  |  |  |  |  |  |  |  |  |  |  |  |  |  |  |  |  |  |  |  |  |  |  |  |  |  |  |  |  |  |  |  |  |  |  |  |  |  |  |  |  |  |  |  |  |  |  |  |  |  |  |  |  |  |  |  |  |  |  |  |  |  |  |  |  |  |  |  |  |  |  |  |  |  |  |  |  |  |  |  |  |  |  |  |  |  |  |  |  |  |  |  |  |  |  |  |  |  |  |  |  |  |  |  |  |  |  |  |  |  |  |  |  |  |  |  |  |  |  |  |  |  |  |  |  |  |  |  |  |  |  |  |  |  |  |  |  |  |  |  |  |  |  |  |  |  |  |  |  |  |  |  |  |  |  |  |  |  |  |  |  |  |  |  |  |  |  |  |  |  |  |  |  |  |  |  |  |  |  |  |  |  |  |  |  |  |  |  |  |  |  |  |  |  |  |  |  |  |  |  |  |  |  |  |  |  |  |  |  |  |  |  |  |  |  |  |  |  |  |  |  |  |  |  |  |  |  |  |  |  |  |  |  |  |  |  |  |  |  |  |  |  |  |  |  |  |  |  |  |  |  |  |  |  |  |  |  |  |  |  |  |  |  |  |  |  |  |  |  |  |  |  |  |  |  |  |  |  |  |  |  |  |  |  |  |  |  |  |  |  |  |  |  |  |  |  |  |  |  |  |  |  |  |  |  |  |  |  |  |  |  |  |  |  |  |  |  |  |  |  |  |  |  |  |  |  |  |  |  |  |  |  |  |  |  |  |  |  |  |  |  |  |  |  |  |  |  |  |  |  |  |  |  |  |  |  |  |  |  |  |  |  |  |  |  |  |  |  |  |  |  |  |  |  |  |  |  |  |  |  |  |  |  |  |  |  |  |  |  |  |  |  |  |  |  |  |  |  |  |  |  |  |  |  |  |  |  |  |  |  |  |  |  |  |  |  |  |  |  |  |  |  |  |  |  |  |  |  |  |  |  |  |  |  |  |  |  |  |  |  |  |  |  |  |  |  |  |  |  |  |  |  |  |  |  |  |  |  |  |  |  |  |  |  |  |  |  |  |  |
|---------------|------------|---|---|---|---|---|---|---|---|---|---|---|---|---|---|---|---|---|---|---|---|---|-----|---------------|------------|---|---|---|---|---|---|---|---|---|---|-----------------|------------|---|---|---|---|---|---|---|---|---|---|-----|--|--|--|--|--|--|--|--|--|--|--|--|--|--|--|--|--|--|--|--|--|--|--|--|--|--|--|--|--|--|--|--|--|--|--|--|--|--|--|--|--|--|--|--|--|--|--|--|--|--|--|--|--|--|--|--|--|--|--|--|--|--|--|--|--|--|--|--|--|--|--|--|--|--|--|--|--|--|--|--|--|--|--|--|--|--|--|--|--|--|--|--|--|--|--|--|--|--|--|--|--|--|--|--|--|--|--|--|--|--|--|--|--|--|--|--|--|--|--|--|--|--|--|--|--|--|--|--|--|--|--|--|--|--|--|--|--|--|--|--|--|--|--|--|--|--|--|--|--|--|--|--|--|--|--|--|--|--|--|--|--|--|--|--|--|--|--|--|--|--|--|--|--|--|--|--|--|--|--|--|--|--|--|--|--|--|--|--|--|--|--|--|--|--|--|--|--|--|--|--|--|--|--|--|--|--|--|--|--|--|--|--|--|--|--|--|--|--|--|--|--|--|--|--|--|--|--|--|--|--|--|--|--|--|--|--|--|--|--|--|--|--|--|--|--|--|--|--|--|--|--|--|--|--|--|--|--|--|--|--|--|--|--|--|--|--|--|--|--|--|--|--|--|--|--|--|--|--|--|--|--|--|--|--|--|--|--|--|--|--|--|--|--|--|--|--|--|--|--|--|--|--|--|--|--|--|--|--|--|--|--|--|--|--|--|--|--|--|--|--|--|--|--|--|--|--|--|--|--|--|--|--|--|--|--|--|--|--|--|--|--|--|--|--|--|--|--|--|--|--|--|--|--|--|--|--|--|--|--|--|--|--|--|--|--|--|--|--|--|--|--|--|--|--|--|--|--|--|--|--|--|--|--|--|--|--|--|--|--|--|--|--|--|--|--|--|--|--|--|--|--|--|--|--|--|--|--|--|--|--|--|--|--|--|--|--|--|--|--|--|--|--|--|--|--|--|--|--|--|--|--|--|--|--|--|--|--|--|--|--|--|--|--|--|--|--|--|--|--|--|--|--|--|--|--|--|--|--|--|--|--|--|--|--|--|--|--|--|--|--|--|--|--|--|--|--|--|--|--|--|--|--|--|--|--|--|--|--|--|--|--|--|--|--|--|--|--|--|--|--|--|--|--|--|--|--|--|--|--|--|--|--|--|--|--|--|--|--|--|--|--|--|--|--|--|--|--|--|--|--|--|--|--|--|--|--|--|--|--|--|--|--|--|--|--|--|--|--|--|--|--|--|--|--|--|--|--|--|--|--|--|--|--|--|--|--|--|--|--|--|--|--|--|--|--|--|--|--|--|--|--|--|--|--|--|--|--|--|--|--|--|--|--|--|--|--|--|--|--|--|--|--|--|--|--|--|--|--|--|--|--|--|--|--|--|--|--|--|--|--|--|--|--|--|--|--|--|--|--|--|--|--|--|--|--|--|--|--|--|--|--|--|--|--|--|--|--|--|--|--|--|--|--|--|--|--|--|--|--|--|--|--|--|--|--|--|--|--|--|--|--|--|--|--|--|--|--|--|--|--|--|--|--|--|--|--|--|--|--|--|--|--|--|--|--|--|--|--|--|--|--|--|--|--|--|--|--|--|--|--|--|--|--|--|--|--|--|--|--|--|--|--|--|--|--|--|--|--|--|--|--|--|--|--|--|--|--|--|--|--|--|--|--|--|--|--|--|--|--|--|--|--|--|--|--|--|--|--|--|--|--|--|--|--|--|--|--|--|--|--|--|--|--|--|--|--|--|--|--|--|--|--|--|--|--|--|--|--|--|--|--|--|--|--|--|--|--|--|--|--|--|--|--|--|--|--|--|--|--|--|--|--|--|--|--|--|--|--|--|--|--|--|--|--|--|--|--|--|--|--|--|--|--|--|--|--|--|--|--|--|--|--|--|--|--|--|--|--|--|--|--|--|--|--|--|--|--|--|--|--|--|--|--|--|--|--|--|--|--|--|--|--|--|--|--|--|--|--|--|--|--|--|--|--|--|--|--|--|--|--|--|--|--|--|--|--|--|--|--|--|--|--|--|--|--|--|--|--|--|--|--|--|--|--|--|--|--|--|--|--|--|--|--|--|--|--|--|--|--|--|--|--|--|--|--|--|--|--|--|--|--|--|--|--|--|--|--|--|--|--|--|--|--|--|--|--|--|--|--|--|--|--|--|--|--|--|--|--|--|--|--|--|--|--|--|--|--|--|--|--|--|--|--|--|--|--|--|--|--|--|--|--|--|--|--|--|--|--|--|--|--|--|--|--|--|--|--|--|--|--|--|--|--|--|--|--|--|--|--|--|--|--|--|--|--|--|--|--|--|--|--|--|--|--|--|--|--|--|--|--|--|--|--|--|--|--|--|--|--|--|--|--|--|--|--|--|--|--|--|--|--|--|--|--|--|--|--|--|--|--|--|--|--|--|--|--|--|--|--|--|--|--|--|--|--|--|--|--|--|--|--|--|--|--|--|--|--|--|--|--|--|--|--|--|--|--|--|--|--|--|--|--|--|--|--|--|--|--|--|--|--|--|--|--|--|--|--|--|--|--|--|--|--|--|--|--|--|--|--|--|--|--|--|--|--|--|--|--|--|--|--|--|--|--|--|--|--|--|--|--|--|--|--|--|--|--|--|--|--|--|--|--|--|--|--|--|--|--|--|--|--|--|--|--|--|--|--|--|--|--|--|--|--|--|--|--|--|--|--|--|--|--|--|--|--|--|--|--|--|--|--|--|--|--|--|--|--|--|--|--|--|--|--|--|--|--|--|--|--|--|--|--|--|--|
| Longhorn Bees | Percentage | A | B | C | D | B | A | A | C | A | A | 1 | 1 | 1 | 0 | 1 | 0 | 0 | 0 | 0 | 0 | 1 | 50% | Longhorn Bees | Percentage | A | B | C | A | B | A | D | A | D | A | Student Curious | Percentage | 1 | 1 | 1 | 1 | 0 | 1 | 1 | 1 | 1 | 1 | 0.9 |  |  |  |  |  |  |  |  |  |  |  |  |  |  |  |  |  |  |  |  |  |  |  |  |  |  |  |  |  |  |  |  |  |  |  |  |  |  |  |  |  |  |  |  |  |  |  |  |  |  |  |  |  |  |  |  |  |  |  |  |  |  |  |  |  |  |  |  |  |  |  |  |  |  |  |  |  |  |  |  |  |  |  |  |  |  |  |  |  |  |  |  |  |  |  |  |  |  |  |  |  |  |  |  |  |  |  |  |  |  |  |  |  |  |  |  |  |  |  |  |  |  |  |  |  |  |  |  |  |  |  |  |  |  |  |  |  |  |  |  |  |  |  |  |  |  |  |  |  |  |  |  |  |  |  |  |  |  |  |  |  |  |  |  |  |  |  |  |  |  |  |  |  |  |  |  |  |  |  |  |  |  |  |  |  |  |  |  |  |  |  |  |  |  |  |  |  |  |  |  |  |  |  |  |  |  |  |  |  |  |  |  |  |  |  |  |  |  |  |  |  |  |  |  |  |  |  |  |  |  |  |  |  |  |  |  |  |  |  |  |  |  |  |  |  |  |  |  |  |  |  |  |  |  |  |  |  |  |  |  |  |  |  |  |  |  |  |  |  |  |  |  |  |  |  |  |  |  |  |  |  |  |  |  |  |  |  |  |  |  |  |  |  |  |  |  |  |  |  |  |  |  |  |  |  |  |  |  |  |  |  |  |  |  |  |  |  |  |  |  |  |  |  |  |  |  |  |  |  |  |  |  |  |  |  |  |  |  |  |  |  |  |  |  |  |  |  |  |  |  |  |  |  |  |  |  |  |  |  |  |  |  |  |  |  |  |  |  |  |  |  |  |  |  |  |  |  |  |  |  |  |  |  |  |  |  |  |  |  |  |  |  |  |  |  |  |  |  |  |  |  |  |  |  |  |  |  |  |  |  |  |  |  |  |  |  |  |  |  |  |  |  |  |  |  |  |  |  |  |  |  |  |  |  |  |  |  |  |  |  |  |  |  |  |  |  |  |  |  |  |  |  |  |  |  |  |  |  |  |  |  |  |  |  |  |  |  |  |  |  |  |  |  |  |  |  |  |  |  |  |  |  |  |  |  |  |  |  |  |  |  |  |  |  |  |  |  |  |  |  |  |  |  |  |  |  |  |  |  |  |  |  |  |  |  |  |  |  |  |  |  |  |  |  |  |  |  |  |  |  |  |  |  |  |  |  |  |  |  |  |  |  |  |  |  |  |  |  |  |  |  |  |  |  |  |  |  |  |  |  |  |  |  |  |  |  |  |  |  |  |  |  |  |  |  |  |  |  |  |  |  |  |  |  |  |  |  |  |  |  |  |  |  |  |  |  |  |  |  |  |  |  |  |  |  |  |  |  |  |  |  |  |  |  |  |  |  |  |  |  |  |  |  |  |  |  |  |  |  |  |  |  |  |  |  |  |  |  |  |  |  |  |  |  |  |  |  |  |  |  |  |  |  |  |  |  |  |  |  |  |  |  |  |  |  |  |  |  |  |  |  |  |  |  |  |  |  |  |  |  |  |  |  |  |  |  |  |  |  |  |  |  |  |  |  |  |  |  |  |  |  |  |  |  |  |  |  |  |  |  |  |  |  |  |  |  |  |  |  |  |  |  |  |  |  |  |  |  |  |  |  |  |  |  |  |  |  |  |  |  |  |  |  |  |  |  |  |  |  |  |  |  |  |  |  |  |  |  |  |  |  |  |  |  |  |  |  |  |  |  |  |  |  |  |  |  |  |  |  |  |  |  |  |  |  |  |  |  |  |  |  |  |  |  |  |  |  |  |  |  |  |  |  |  |  |  |  |  |  |  |  |  |  |  |  |  |  |  |  |  |  |  |  |  |  |  |  |  |  |  |  |  |  |  |  |  |  |  |  |  |  |  |  |  |  |  |  |  |  |  |  |  |  |  |  |  |  |  |  |  |  |  |  |  |  |  |  |  |  |  |  |  |  |  |  |  |  |  |  |  |  |  |  |  |  |  |  |  |  |  |  |  |  |  |  |  |  |  |  |  |  |  |  |  |  |  |  |  |  |  |  |  |  |  |  |  |  |  |  |  |  |  |  |  |  |  |  |  |  |  |  |  |  |  |  |  |  |  |  |  |  |  |  |  |  |  |  |  |  |  |  |  |  |  |  |  |  |  |  |  |  |  |  |  |  |  |  |  |  |  |  |  |  |  |  |  |  |  |  |  |  |  |  |  |  |  |  |  |  |  |  |  |  |  |  |  |  |  |  |  |  |  |  |  |  |  |  |  |  |  |  |  |  |  |  |  |  |  |  |  |  |  |  |  |  |  |  |  |  |  |  |  |  |  |  |  |  |  |  |  |  |  |  |  |  |  |  |  |  |  |  |  |  |  |  |  |  |  |  |  |  |  |  |  |  |  |  |  |  |  |  |  |  |  |  |  |  |  |  |  |  |  |  |  |  |  |  |  |  |  |  |  |  |  |  |  |  |  |  |  |  |  |  |  |  |  |  |  |  |  |  |  |  |  |  |  |  |  |  |  |  |  |  |  |  |  |  |  |  |  |  |  |  |  |  |  |  |  |  |  |  |  |  |  |  |  |  |  |  |  |  |  |  |  |  |  |  |  |  |  |  |  |  |  |  |  |  |  |  |  |  |  |  |  |  |  |  |  |  |  |  |  |  |  |  |  |  |  |  |  |  |  |  |  |  |  |  |  |  |  |  |  |  |  |  |  |  |  |  |  |  |  |  |  |  |  |  |  |  |  |  |  |  |  |  |  |  |  |  |  |  |  |  |  |
|               |            |   |   |   |   |   |   |   |   |   |   |   |   |   |   |   |   |   |   |   |   |   |     |               |            |   |   |   |   |   |   |   |   |   |   |                 |            |   |   |   |   |   |   |   |   |   |   |     |  |  |  |  |  |  |  |  |  |  |  |  |  |  |  |  |  |  |  |  |  |  |  |  |  |  |  |  |  |  |  |  |  |  |  |  |  |  |  |  |  |  |  |  |  |  |  |  |  |  |  |  |  |  |  |  |  |  |  |  |  |  |  |  |  |  |  |  |  |  |  |  |  |  |  |  |  |  |  |  |  |  |  |  |  |  |  |  |  |  |  |  |  |  |  |  |  |  |  |  |  |  |  |  |  |  |  |  |  |  |  |  |  |  |  |  |  |  |  |  |  |  |  |  |  |  |  |  |  |  |  |  |  |  |  |  |  |  |  |  |  |  |  |  |  |  |  |  |  |  |  |  |  |  |  |  |  |  |  |  |  |  |  |  |  |  |  |  |  |  |  |  |  |  |  |  |  |  |  |  |  |  |  |  |  |  |  |  |  |  |  |  |  |  |  |  |  |  |  |  |  |  |  |  |  |  |  |  |  |  |  |  |  |  |  |  |  |  |  |  |  |  |  |  |  |  |  |  |  |  |  |  |  |  |  |  |  |  |  |  |  |  |  |  |  |  |  |  |  |  |  |  |  |  |  |  |  |  |  |  |  |  |  |  |  |  |  |  |  |  |  |  |  |  |  |  |  |  |  |  |  |  |  |  |  |  |  |  |  |  |  |  |  |  |  |  |  |  |  |  |  |  |  |  |  |  |  |  |  |  |  |  |  |  |  |  |  |  |  |  |  |  |  |  |  |  |  |  |  |  |  |  |  |  |  |  |  |  |  |  |  |  |  |  |  |  |  |  |  |  |  |  |  |  |  |  |  |  |  |  |  |  |  |  |  |  |  |  |  |  |  |  |  |  |  |  |  |  |  |  |  |  |  |  |  |  |  |  |  |  |  |  |  |  |  |  |  |  |  |  |  |  |  |  |  |  |  |  |  |  |  |  |  |  |  |  |  |  |  |  |  |  |  |  |  |  |  |  |  |  |  |  |  |  |  |  |  |  |  |  |  |  |  |  |  |  |  |  |  |  |  |  |  |  |  |  |  |  |  |  |  |  |  |  |  |  |  |  |  |  |  |  |  |  |  |  |  |  |  |  |  |  |  |  |  |  |  |  |  |  |  |  |  |  |  |  |  |  |  |  |  |  |  |  |  |  |  |  |  |  |  |  |  |  |  |  |  |  |  |  |  |  |  |  |  |  |  |  |  |  |  |  |  |  |  |  |  |  |  |  |  |  |  |  |  |  |  |  |  |  |  |  |  |  |  |  |  |  |  |  |  |  |  |  |  |  |  |  |  |  |  |  |  |  |  |  |  |  |  |  |  |  |  |  |  |  |  |  |  |  |  |  |  |  |  |  |  |  |  |  |  |  |  |  |  |  |  |  |  |  |  |  |  |  |  |  |  |  |  |  |  |  |  |  |  |  |  |  |  |  |  |  |  |  |  |  |  |  |  |  |  |  |  |  |  |  |  |  |  |  |  |  |  |  |  |  |  |  |  |  |  |  |  |  |  |  |  |  |  |  |  |  |  |  |  |  |  |  |  |  |  |  |  |  |  |  |  |  |  |  |  |  |  |  |  |  |  |  |  |  |  |  |  |  |  |  |  |  |  |  |  |  |  |  |  |  |  |  |  |  |  |  |  |  |  |  |  |  |  |  |  |  |  |  |  |  |  |  |  |  |  |  |  |  |  |  |  |  |  |  |  |  |  |  |  |  |  |  |  |  |  |  |  |  |  |  |  |  |  |  |  |  |  |  |  |  |  |  |  |  |  |  |  |  |  |  |  |  |  |  |  |  |  |  |  |  |  |  |  |  |  |  |  |  |  |  |  |  |  |  |  |  |  |  |  |  |  |  |  |  |  |  |  |  |  |  |  |  |  |  |  |  |  |  |  |  |  |  |  |  |  |  |  |  |  |  |  |  |  |  |  |  |  |  |  |  |  |  |  |  |  |  |  |  |  |  |  |  |  |  |  |  |  |  |  |  |  |  |  |  |  |  |  |  |  |  |  |  |  |  |  |  |  |  |  |  |  |  |  |  |  |  |  |  |  |  |  |  |  |  |  |  |  |  |  |  |  |  |  |  |  |  |  |  |  |  |  |  |  |  |  |  |  |  |  |  |  |  |  |  |  |  |  |  |  |  |  |  |  |  |  |  |  |  |  |  |  |  |  |  |  |  |  |  |  |  |  |  |  |  |  |  |  |  |  |  |  |  |  |  |  |  |  |  |  |  |  |  |  |  |  |  |  |  |  |  |  |  |  |  |  |  |  |  |  |  |  |  |  |  |  |  |  |  |  |  |  |  |  |  |  |  |  |  |  |  |  |  |  |  |  |  |  |  |  |  |  |  |  |  |  |  |  |  |  |  |  |  |  |  |  |  |  |  |  |  |  |  |  |  |  |  |  |  |  |  |  |  |  |  |  |  |  |  |  |  |  |  |  |  |  |  |  |  |  |  |  |  |  |  |  |  |  |  |  |  |  |  |  |  |  |  |  |  |  |  |  |  |  |  |  |  |  |  |  |  |  |  |  |  |  |  |  |  |  |  |  |  |  |  |  |  |  |  |  |  |  |  |  |  |  |  |  |  |  |  |  |  |  |  |  |  |  |  |  |  |  |  |  |  |  |  |  |  |  |  |  |  |  |  |  |  |  |  |  |  |  |  |  |  |  |  |  |  |  |  |  |  |  |  |  |  |  |  |  |  |  |  |  |  |  |  |  |  |  |  |  |  |  |  |  |  |  |  |  |  |  |  |  |  |  |  |  |  |  |  |  |  |  |  |  |  |  |  |

| Rank | Best Small Corporation | Percentage of Environmental | Rank | Best Small Corporation | Percentage of Environmental |
|------|------------------------|-----------------------------|------|------------------------|-----------------------------|
| 1    | 0                      | 1                           | 1    | 0                      | 1                           |
| 2    | 0                      | 1                           | 2    | 0                      | 1                           |
| 3    | 0                      | 1                           | 3    | 0                      | 1                           |
| 4    | 0                      | 1                           | 4    | 0                      | 1                           |
| 5    | 0                      | 1                           | 5    | 0                      | 1                           |
| 6    | 0                      | 1                           | 6    | 0                      | 1                           |
| 7    | 0                      | 1                           | 7    | 0                      | 1                           |
| 8    | 0                      | 1                           | 8    | 0                      | 1                           |
| 9    | 0                      | 1                           | 9    | 0                      | 1                           |
| 10   | 0                      | 1                           | 10   | 0                      | 1                           |
| 11   | 0                      | 1                           | 11   | 0                      | 1                           |
| 12   | 0                      | 1                           | 12   | 0                      | 1                           |
| 13   | 0                      | 1                           | 13   | 0                      | 1                           |
| 14   | 0                      | 1                           | 14   | 0                      | 1                           |
| 15   | 0                      | 1                           | 15   | 0                      | 1                           |
| 16   | 0                      | 1                           | 16   | 0                      | 1                           |
| 17   | 0                      | 1                           | 17   | 0                      | 1                           |
| 18   | 0                      | 1                           | 18   | 0                      | 1                           |
| 19   | 0                      | 1                           | 19   | 0                      | 1                           |
| 20   | 0                      | 1                           | 20   | 0                      | 1                           |
| 21   | 0                      | 1                           | 21   | 0                      | 1                           |
| 22   | 0                      | 1                           | 22   | 0                      | 1                           |
| 23   | 0                      | 1                           | 23   | 0                      | 1                           |
| 24   | 0                      | 1                           | 24   | 0                      | 1                           |
| 25   | 0                      | 1                           | 25   | 0                      | 1                           |
| 26   | 0                      | 1                           | 26   | 0                      | 1                           |
| 27   | 0                      | 1                           | 27   | 0                      | 1                           |
| 28   | 0                      | 1                           | 28   | 0                      | 1                           |
| 29   | 0                      | 1                           | 29   | 0                      | 1                           |
| 30   | 0                      | 1                           | 30   | 0                      | 1                           |
| 31   | 0                      | 1                           | 31   | 0                      | 1                           |
| 32   | 0                      | 1                           | 32   | 0                      | 1                           |
| 33   | 0                      | 1                           | 33   | 0                      | 1                           |
| 34   | 0                      | 1                           | 34   | 0                      | 1                           |
| 35   | 0                      | 1                           | 35   | 0                      | 1                           |
| 36   | 0                      | 1                           | 36   | 0                      | 1                           |
| 37   | 0                      | 1                           | 37   | 0                      | 1                           |
| 38   | 0                      | 1                           | 38   | 0                      | 1                           |
| 39   | 0                      | 1                           | 39   | 0                      | 1                           |
| 40   | 0                      | 1                           | 40   | 0                      | 1                           |
| 41   | 0                      | 1                           | 41   | 0                      | 1                           |
| 42   | 0                      | 1                           | 42   | 0                      | 1                           |
| 43   | 0                      | 1                           | 43   | 0                      | 1                           |
| 44   | 0                      | 1                           | 44   | 0                      | 1                           |
| 45   | 0                      | 1                           | 45   | 0                      | 1                           |
| 46   | 0                      | 1                           | 46   | 0                      | 1                           |
| 47   | 0                      | 1                           | 47   | 0                      | 1                           |
| 48   | 0                      | 1                           | 48   | 0                      | 1                           |
| 49   | 0                      | 1                           | 49   | 0                      | 1                           |
| 50   | 0                      | 1                           | 50   | 0                      | 1                           |

### FEEDBACK RAW DATA (PARTICIPANT DE-ID BY #)

| Participant | Please rate this event on how informative it was, how useful the knowledge and skills will be to you, & how engaged you were as a participant |        |         | As a result of today's workshop, I am better able to...                |                                                                  |                                                                                    |                                                                                  |                                                                                                                 |                                                                 |                                                                                                                    | The best part(s) of attending this event was/were: | This event could be improved by:                                                                                                                                                            |
|-------------|-----------------------------------------------------------------------------------------------------------------------------------------------|--------|---------|------------------------------------------------------------------------|------------------------------------------------------------------|------------------------------------------------------------------------------------|----------------------------------------------------------------------------------|-----------------------------------------------------------------------------------------------------------------|-----------------------------------------------------------------|--------------------------------------------------------------------------------------------------------------------|----------------------------------------------------|---------------------------------------------------------------------------------------------------------------------------------------------------------------------------------------------|
|             | Informative                                                                                                                                   | Useful | Engaged | Explain the importance of native bees in ecosystems and agroecosystems | Distinguish native bees from flying visitors that look like them | Use basic guide to ID the common native bees in Texas gardens, farms, or wildlands | Use my foundation of bee classification to learn more about native bee diversity | Describe management practices to conserve native bee habitats given my knowledge of their nesting habits & diet | Identify native prairie plants for native bees in Central Texas | Briefly describe how you intend to use skills/knowledge that you learned in today's session in your practice/home? |                                                    |                                                                                                                                                                                             |
| 1           | 5                                                                                                                                             | 5      | 5       | 4                                                                      | 5                                                                | 4                                                                                  | 5                                                                                | 5                                                                                                               | 4                                                               |                                                                                                                    |                                                    |                                                                                                                                                                                             |
| 2           | 5                                                                                                                                             | 5      | 5       | 4                                                                      | 4                                                                | 4                                                                                  | 4                                                                                | 4                                                                                                               | 3                                                               | Add background to pollinators                                                                                      |                                                    | Graph seems either wrong or many more samples were taken and logged of the bees without bare ground. As I read the graph, it suggests bees go up as ground is covered. Opposite of reality? |
| 3           | 5                                                                                                                                             | 5      | 5       | 4                                                                      | 4                                                                | 4                                                                                  | 4                                                                                | 4                                                                                                               | 4                                                               | UT course project                                                                                                  |                                                    |                                                                                                                                                                                             |

# NATIVE BEES OF TEXAS COURSE – FEEDBACK - 2018

|    |   |   |   |   |   |   |   |   |   |                                                                                                |                                                                                                                                |                                                                                    |
|----|---|---|---|---|---|---|---|---|---|------------------------------------------------------------------------------------------------|--------------------------------------------------------------------------------------------------------------------------------|------------------------------------------------------------------------------------|
| 4  | 5 | 5 | 5 | 5 | 5 | 4 | 4 | 4 | 4 | Reduce use of insecticides; grow pollinator garden                                             | Exploring the gardens                                                                                                          | Longer garden time                                                                 |
| 5  | 5 | 5 | 5 | 5 | 5 | 5 | 4 | 4 | 4 | I intend to teach others about native bee populations & behaviors, and to plant native plants! | Learning about how bees build their nests, especially the separated                                                            | Talking a little bit more about identifying plants!                                |
| 6  | 5 | 5 | 5 | 5 | 4 | 4 | 4 | 4 | 4 | Teach others and improve habitat                                                               | Handouts, style of presentation/photos on screen                                                                               | More sharing of info between participants                                          |
| 7  | 5 | 5 | 5 | 5 | 5 | 5 | 5 | 5 | 5 | I can plant more bee specific plants                                                           | Learning from an expert and going outside                                                                                      | [heart with arrow going through it]                                                |
| 8  | 5 | 5 | 5 | 5 | 5 | 4 | 4 | 5 | 5 | I'm converting a small lawn (500 ft2) to native TX wildflower meadow                           | ID and conservation                                                                                                            | I wish this workshop were longer or multi-segment!                                 |
| 9  | 5 | 5 | 5 | 5 | 4 | 5 | 4 | 5 | 5 | Increase diversity of bees in my yard                                                          | Nice mix of lecture, lab and field time                                                                                        |                                                                                    |
| 10 |   |   |   | 5 | 4 | 4 | 5 | 5 | 4 | Keep more leaves on ground and use as mulch. Also plant more native plants                     | Being at the Wildflower Center. Learning more about the native life                                                            | I thought the class was great                                                      |
| 11 | 5 | 5 | 5 | 5 | 4 | 4 | 4 | 4 | 5 |                                                                                                | I didn't know that many bees were ground nesters! Makes a huge difference in how I will garden in the future - real aha moment | Nothing that could have been done by the presenter...weather could have cooperated |
| 12 | 5 | 5 | 5 | 5 | 5 | 5 | 5 | 5 | 4 | For master gardener training sessions lecture to garden clubs                                  | All parts were extremely useful                                                                                                | an increased time, another couple of hours                                         |
