# Supplementary material for: The Native Bees of Texas: Evaluating the Benefits of a Public Engagement Course
Source: MDPI journal article supplement (doi:10.3390/insects12080702), 2021-08-05
Supplement: s1 [file s1]

### 3 TEAMS (RED, BLUE, YELLOW) 2 STUDENTS AND 1 EXPERT FIXED ROUTE SURVEY FLOWER VISITING INSECTS

| INSECTS - expert species, student genera            | FAMILY       | Expert | Students | Expert | Students | Expert | Students |
|-----------------------------------------------------|--------------|--------|----------|--------|----------|--------|----------|
| Honey bee ( <i>Apis mellifera</i> )                 | Apidae       | 6      | 15       | 11     | 0        | 30     | 11       |
| Bumble bee ( <i>Bombus pensylvanica</i> )           | Apidae       | 6      | 17       | 4      | 17       | 12     | 8        |
| Large carpenter bee ( <i>Xylocopa virginica</i> )   | Apidae       | 5      | 1        | 7      | 0        | 11     | 5        |
| Large carpenter bee ( <i>Xylocopa micans</i> )      | Apidae       | 1      | 0        | 1      | 0        | 0      | 0        |
| Hairy leg/Long-horned ( <i>Diadasia enavata</i> )   | Apidae       | 1      | 1        | 3      | 0        | 0      | 0        |
| Hairy leg/Long-horned ( <i>Melissodes</i> sp.)      | Apidae       | 7      | 0        | 0      | 0        | 3      | 2        |
| Hairy leg/Long-horned ( <i>Centris atripes</i> )    | Apidae       | 1      | 0        | 0      | 0        | 8      | 0        |
| Green bee (possible green sweat bee)                | Halictidae   | 0      | 0        | 0      | 2        | 0      | 0        |
| Tiny dark bee ( <i>Lasioglossum/Ceratina</i> )      | Hal. Apid.   | 0      | 0        | 0      | 0        | 1      | 1        |
| Striped abdomen plasterer                           | Colletidae   | 0      | 0        | 0      | 0        | 0      | 3        |
| Striped hairy belly leafcutter ( <i>Megachile</i> ) | Megachilidae | 5      | 0        | 8      | 0        | 19     | 15       |
| <i>Megachile exile</i>                              | Megachilidae | 7      | 0        | 0      | 0        | 0      | 0        |
| <i>Anthidiellum</i> sp.                             | Megachilidae | 3      | 0        | 0      | 0        | 0      | 0        |
| Cuckoo/parasitic bee ( <i>Coelioxys</i> sp)         | -            | 1      | 0        | 0      | 0        | 0      | 0        |
| Unidentified native bees ( <i>Megachile</i> ?)      |              | 0      | 9        | 0      | 88       | 0      | 0        |
| Fly bombyliid                                       | Bombyliidae  | 0      | 6        | 4      | 1        | 3      | 0        |
| Wasp Mexican honey                                  | Vespidae     | 1      | 1        | 1      | 5        | 4      | 1        |
| Butterfly skipper                                   | Hesperiidae  | 8      | 11       | 6      | 0        | 0      | 0        |

### GROUPED (EXPERT'S) SPECIES FROM TABLE ABOVE INTO (STUDENT'S) BEE GROUPS (PARATAXONOMIC UNITS)

| INSECT Genera or para-taxonomic groups<br>(grouped species from table above) | FAMILY       | Red<br>Expert | Red<br>Students | Blue<br>Expert | Blue<br>Students | Yellow<br>Expert | Yellow<br>Students |
|------------------------------------------------------------------------------|--------------|---------------|-----------------|----------------|------------------|------------------|--------------------|
| Honey bee ( <i>Apis mellifera</i> )                                          | Apidae       | 6             | 15              | 11             | 0                | 30               | 11                 |
| Bumble bee                                                                   | Apidae       | 6             | 17              | 4              | 17               | 12               | 8                  |
| Large carpenter bee (2 spp)                                                  | Apidae       | 6             | 1               | 8              | 0                | 11               | 5                  |
| Hairy leg/Longhorn (3 spp)                                                   | Apidae       | 9             | 1               | 3              | 0                | 11               | 2                  |
| Green sweat bee                                                              | Halictidae   | 0             | 0               | 0              | 2                | 0                | 0                  |
| Tiny dark bee                                                                | Hal. Apid.   | 0             | 0               | 0              | 0                | 1                | 1                  |
| Striped abdomen plasterer                                                    | Colletidae   | 0             | 0               | 0              | 0                | 0                | 3                  |
| Striped hairy belly leafcutter (2 spp)                                       | Megachilidae | 15            | 0               | 8              | 0                | 19               | 15                 |
| Cuckoo/parasitic bee                                                         | -            | 1             | 0               | 0              | 0                | 0                | 0                  |
| Unidentified native bee                                                      | -            | 0             | 9               | 0              | 88               | 0                | 0                  |
| Fly bombyliid                                                                | Bombyliidae  | 0             | 6               | 4              | 1                | 3                | 0                  |
| Wasp (Mexican honey, <i>Brachystaga mellifera</i> )                          | Vespidae     | 1             | 1               | 1              | 5                | 4                | 1                  |
| Butterfly skipper                                                            | Hesperiidae  | 8             | 11              | 6              | 0                | 0                | 0                  |

# SUMMARY TABLE – FAMILY & GENERA OBSERVED BY EXPERTS, 3 TEAMS

(Unidentified bees were dropped because there was no expert identification/verification or corresponding data)

| FAMILY       | Insect Genera (Experts)                                 | R Expert | B Expert | Y Expert | SUM | MEAN  |
|--------------|---------------------------------------------------------|----------|----------|----------|-----|-------|
| Apidae       | Honey bee ( <i>Apis mellifera</i> )                     | 6        | 11       | 30       | 47  | 15.67 |
| Megachilidae | Striped hairy belly leafcutter ( <i>Megachile</i> )     | 15       | 8        | 19       | 42  | 14.00 |
| Apidae       | Large carpenter bee ( <i>Xylocopa</i> 2)                | 6        | 8        | 11       | 25  | 8.33  |
| Apidae       | Hairy leg/Longhorn (3 spp)                              | 9        | 3        | 11       | 23  | 7.67  |
| Apidae       | Bumble bee ( <i>Bombus</i> )                            | 6        | 4        | 12       | 22  | 7.33  |
| Hal. Apid.   | Tiny dark bee ( <i>Lasioglossum</i> / <i>Ceratina</i> ) | 0        | 0        | 1        | 1   | 0.33  |
| -            | Cuckoo/parasitic bee ( <i>Coelioxys</i> )               | 1        | 0        | 0        | 1   | 0.33  |
| Hesperidae   | Butterfly (Skipper)                                     | 8        | 6        | 0        | 14  | 4.67  |
| Bombyliidae  | Fly ( <i>Bombyliidae</i> )                              | 0        | 4        | 3        | 7   | 2.33  |
| Vespidae     | Wasp (Mexican honey) <i>Brachystaga</i>                 | 1        | 1        | 4        | 6   | 2.00  |
|              | ALL BEE COUNTS                                          | 43       | 34       | 84       | 161 | 53.67 |
|              | NATIVE BEE COUNTS                                       | 37       | 23       | 54       | 114 | 38.00 |
|              | NON-BEE INSECT / COUNTS                                 | 9        | 11       | 7        | 9   |       |
|              | ALL INSECTS                                             |          |          |          | 188 |       |

# SUMMARY TABLE – FAMILY & GENERA OBSERVED BY STUDENTS, 3 TEAMS

| FAMILY | Insect Genera counts (Students)            | R Students | B Students | Y Students | MEAN  |
|--------|--------------------------------------------|------------|------------|------------|-------|
| 1      | Honey bee                                  | 15         | 0          | 11         | 8.67  |
| 2      | Bumble bee                                 | 17         | 17         | 8          | 14    |
| 3      | Large carpenter bee                        | 1          | 0          | 5          | 2     |
| 4      | Hairy leg/Longhorn                         | 1          | 0          | 2          | 1     |
| 5      | Green sweat bee                            | 0          | 2          | 0          | 0.67  |
| 6      | Tiny dark bee                              | 0          | 0          | 1          | 0.33  |
| 7      | Striped abdomen plasterer                  | 0          | 0          | 3          | 1     |
| 8      | Striped hairy belly leafcutter             | 0          | 0          | 15         | 5     |
| 9      | UnID native bee (leafcutter Gregg's dalea) | 9          | 88         | 0          | 32.33 |
|        | ALL BEE COUNTS                             | 43         | 107        | 45         | 65    |
|        | NATIVE BEE COUNTS                          | 28         | 107        | 34         | 56.33 |
| 1      | Fly                                        | 6          | 1          | 0          | 2.33  |
| 2      | Wasp                                       | 1          | 5          | 1          | 2.33  |
| 3      | Butterfly                                  | 11         | 0          | 0          | 3.67  |
|        | NON-BEE INSECT COUNTS                      | 18         | 6          | 1          | 8.33  |

SUMMARY TABLE – BEE GROUPS OBSERVED BY EXPERTS AND STUDENTS

| BEE GROUPS                                              | EXPERT |       |       |       |      | STUDENT |       |       |      |      |
|---------------------------------------------------------|--------|-------|-------|-------|------|---------|-------|-------|------|------|
|                                                         | SUM    | PROP. | MEAN  | SD    | SE   | SUM     | PROP. | MEAN  | SD   | SE   |
| Honey bee ( <i>Apis mellifera</i> )                     | 47     | 0.29  | 15.67 | 12.66 | 7.32 | 26      | 0.27  | 8.67  | 7.77 | 4.49 |
| Striped hairy belly leafcutter ( <i>Megachile</i> )     | 42     | 0.26  | 14.00 | 5.57  | 3.22 | 15      | 0.16  | 5.00  | 8.66 | 5.01 |
| Large carpenter bee ( <i>Xylocopa</i> 2 spp)            | 25     | 0.16  | 8.33  | 2.52  | 1.46 | 6       | 0.06  | 2.00  | 2.65 | 1.53 |
| Hairy leg/Long-horn (3 spp)                             | 23     | 0.14  | 7.67  | 4.16  | 2.40 | 3       | 0.03  | 1.00  | 1.00 | 0.58 |
| Bumble bee ( <i>Bombus</i> )                            | 22     | 0.14  | 7.33  | 4.16  | 2.40 | 42      | 0.44  | 14.00 | 5.20 | 3.01 |
| Tiny dark bee ( <i>Lasioglossum</i> / <i>Ceratina</i> ) | 1      | 0.01  | 0.33  | 0.58  | 0.34 | 1       | 0.01  | 0.33  | 0.58 | 0.34 |
| Cuckoo/parasitic bee ( <i>Coelioxys</i> )               | 1      | 0.01  | 0.33  | 0.58  | 0.34 | 0       | 0.00  | 0.00  | 0.00 | 0.00 |
| Striped abdomen plasterer                               | 0      | 0.00  | 0.00  | 0.00  | 0.00 | 3       | 0.03  | 1.00  | 1.73 | 1.00 |
| Green sweat bee                                         | 0      | 0.00  | 0.00  | 0.00  | 0.00 | 2       | 0.02  | 0.67  | 1.15 | 0.66 |
| Native bee COUNT / Proportion                           | 114    | 0.71  |       |       |      | 72      | 0.73  |       |      |      |
| TOTAL BEE COUNT                                         | 161    | 1     |       |       |      | 98      | 1     |       |      |      |

| INSECT GROUPS | EXPERTS |       |       |       |      | STUDENTS |       |       |      |      |
|---------------|---------|-------|-------|-------|------|----------|-------|-------|------|------|
|               | SUM     | PROP. | MEAN  | SD    | SE   | SUM      | PROP. | MEAN  | SD   | SE   |
| Native bee    | 114     | 0.61  | 38.00 | 15.52 | 8.97 | 72       | 0.58  | 24.00 | 8.66 | 5.01 |
| Honey bee     | 47      | 0.25  | 15.67 | 12.66 | 7.32 | 26       | 0.22  | 8.67  | 7.77 | 4.49 |
| Butterfly     | 14      | 0.07  | 4.67  | 3.40  | 1.97 | 11       | 0.09  | 3.67  | 5.19 | 3.00 |
| Fly           | 7       | 0.04  | 2.33  | 1.70  | 0.98 | 7        | 0.06  | 2.33  | 2.62 | 1.51 |
| Wasp          | 6       | 0.03  | 2.00  | 1.41  | 0.82 | 7        | 0.06  | 2.33  | 1.89 | 1.09 |

NOTE

I calculated means w different (n = 1, 2 or 3). If 2 people observed a sp. I divided counts/2, if 3 people observed it, I divided counts/3  
 There are different sample sizes because I calculated insects that were present. I did not include zeros (absent) when calculating averages.
