# Supplementary material for: The Native Bees of Texas: Evaluating the Benefits of a Public Engagement Course
Source: MDPI journal article supplement (doi:10.3390/insects12080702), 2021-08-05
Supplement: s1 [file s1]

Table S1. Demographics - anonymous background information (2019, n=21)

| Gender                                                                                                                                                                                                                                                                                                           | DATA                                                                                | Age Range                                                                                                                                                                                                                                                                                                                                                                                                                                                                      | DATA                                                                                                                                                                 |
|------------------------------------------------------------------------------------------------------------------------------------------------------------------------------------------------------------------------------------------------------------------------------------------------------------------|-------------------------------------------------------------------------------------|--------------------------------------------------------------------------------------------------------------------------------------------------------------------------------------------------------------------------------------------------------------------------------------------------------------------------------------------------------------------------------------------------------------------------------------------------------------------------------|----------------------------------------------------------------------------------------------------------------------------------------------------------------------|
| <input type="radio"/> Female<br><input type="radio"/> Male<br><input type="radio"/> Other (please specify)                                                                                                                                                                                                       | <b>F 14 (67%)</b><br><br><b>M 7 (33%)</b>                                           | <input type="radio"/> Under 18<br><input type="radio"/> 18-24<br><input type="radio"/> 25-34<br><input type="radio"/> 35-44<br><input type="radio"/> 45-54<br><input type="radio"/> 55+                                                                                                                                                                                                                                                                                        | <b>18-24: 1 (5%)</b><br><b>35-44: 5 (23%)</b><br><b>45-54: 6 (29%)</b><br><b>55+: 9 (43%)</b>                                                                        |
| Ethnicity                                                                                                                                                                                                                                                                                                        |                                                                                     | Highest degree or school level                                                                                                                                                                                                                                                                                                                                                                                                                                                 |                                                                                                                                                                      |
| <input type="radio"/> White<br><input type="radio"/> Hispanic or Latinx<br><input type="radio"/> Black or African American<br><input type="radio"/> Native American/Indian<br><input type="radio"/> Asian/ Pacific Islander<br><input type="radio"/> Multiracial<br><input type="radio"/> Other (please specify) | <b>White 100%</b>                                                                   | <input type="radio"/> Less than a high school diploma<br><input type="radio"/> High school degree/equivalent (e.g., GED)<br><input type="radio"/> Associate degree (e.g., AA, AS)<br><input type="radio"/> Bachelor's degree (e.g., BA, BS)<br><input type="radio"/> Master's degree (e.g., MA, MS, MEd)<br><input type="radio"/> Professional degree (e.g., MD, DDS, DVM)<br><input type="radio"/> Doctorate (e.g., PhD, EdD)<br><input type="radio"/> Other (please specify) | <b>HS 1 (4.8%)</b><br><b>B 10 (47.6%)</b><br><b>M 9 (42.8%)</b><br><b>D 1 (4.8%)</b>                                                                                 |
| Employment status                                                                                                                                                                                                                                                                                                |                                                                                     | Current or former occupations                                                                                                                                                                                                                                                                                                                                                                                                                                                  | (2018+2019)                                                                                                                                                          |
| <input type="radio"/> Employed full time (40 h)<br><input type="radio"/> Employed part time (20 h)<br><input type="radio"/> Student<br><input type="radio"/> Retired<br><input type="radio"/> Homemaker<br><input type="radio"/> Self-employed                                                                   | <b>FT 13 (68%)</b><br><b>PT 1 (5%)</b><br><b>Ret. 4 (21%)</b><br><b>Stu. 1 (5%)</b> | 11 Naturalist<br>6 Gardener<br>4 Education (Teacher/Professor)<br>1 Environmental Education<br>1 Biology<br>1 Farm / Ranch owner / manager<br>4 Real estate<br>3 Student (college)<br>3 Photography<br>2 Environmental Engineering<br>3 Government - training manager<br>1 Immigration<br>1 NGO worker<br>1 IT project manager<br>1 Physical therapy<br>1 Homemaker                                                                                                            | <b>Reason / motivation to take course</b><br><br><b>curiosity (7), acquiring practical knowledge (10), receiving training credit Master Naturalists (10) in 2019</b> |
| Household income/year                                                                                                                                                                                                                                                                                            | N/A                                                                                 | Primary Residence (ZIP code)                                                                                                                                                                                                                                                                                                                                                                                                                                                   |                                                                                                                                                                      |
|                                                                                                                                                                                                                                                                                                                  |                                                                                     |                                                                                                                                                                                                                                                                                                                                                                                                                                                                                | <b>(15) 786- -</b><br><b>(4) 787- -</b><br><b>(1) 768- -</b><br><b>(1) 781- -</b>                                                                                    |

Tables - *The Native Bees of Texas: Evaluating the benefits of a public engagement course*

**Table S2. Test Results** (Mean % test scores per question across participants, \*p<0.05, \*\*p<0.01) (A. 2018, B. 2019)

| Test - % Correct Responses Pre & Post-Course<br>Standardized Test Questions | A. 2018 (n = 11) |             |            |             |                | B. 2019 (n = 19) |             |            |             |                |
|-----------------------------------------------------------------------------|------------------|-------------|------------|-------------|----------------|------------------|-------------|------------|-------------|----------------|
|                                                                             | Pre              | SE          | Post       | SE          | p-value        | Pre              | SE          | Post       | SE          | p-value        |
| Fly & bee. Which is the fly?                                                | 73%              | 0.14        | 91%        | 0.09        | 0.303          | 100%             | 0.00        | 100%       | 0.00        | 1.000          |
| Wasp & bee. Which is the wasp?                                              | 73%              | 0.14        | 73%        | 0.14        | 1.000          | 84%              | 0.09        | 68%        | 0.11        | 0.187          |
| Bee & flies. Which is the bee?                                              | 36%              | 0.15        | 73%        | 0.14        | 0.102          | 63%              | 0.11        | 79%        | 0.10        | 0.331          |
| Bees. Which is the honey bee?                                               | 55%              | 0.16        | 82%        | 0.12        | 0.193          | 42%              | 0.12        | 68%        | 0.11        | 0.056          |
| What sex is this leafcutter bee?                                            | 45%              | 0.16        | 91%        | 0.09        | 0.028*         | 42%              | 0.12        | 84%        | 0.09        | 0.007**        |
| What features help distinguish bees, flies, wasps?                          | 55%              | 0.16        | 91%        | 0.09        | 0.068          | 53%              | 0.12        | 89%        | 0.07        | 0.005**        |
| Where do most native bees nest?                                             | 64%              | 0.15        | 100%       | 0.00        | 0.035*         | 21%              | 0.10        | 95%        | 0.05        | 0.000**        |
| Why are bees important for ecosystem function?                              | 55%              | 0.16        | 73%        | 0.14        | 0.408          | 74%              | 0.10        | 100%       | 0.00        | 0.021*         |
| What pollination services do bees provide us?                               | 55%              | 0.16        | 100%       | 0.00        | 0.015*         | 84%              | 0.09        | 100%       | 0.00        | 0.083          |
| Why are native bee populations declining?                                   | 91%              | 0.09        | 100%       | 0.00        | 0.363          | 74%              | 0.10        | 89%        | 0.07        | 0.083          |
| <b>Overall Mean (n=10)</b>                                                  | <b>60%</b>       | <b>0.05</b> | <b>87%</b> | <b>0.03</b> | <b>0.009**</b> | <b>64%</b>       | <b>0.04</b> | <b>87%</b> | <b>0.02</b> | <b>0.000**</b> |

**Table S3. Test Results** (Differences by category: ID skills & ecological knowledge, sorted from large to small)

| Test      | Topic Category             | A. 2018 (n=11) |            |              | B. 2019 (n=19) |            |              |
|-----------|----------------------------|----------------|------------|--------------|----------------|------------|--------------|
|           |                            | Pre            | Post       | Diff         | Pre            | Post       | Diff         |
| ID Skills | Bee's Sex                  | 45%            | 91%        | 46%          | 42%            | 84%        | 42%          |
|           | Bee or Fly                 | 36%            | 73%        | 37%          | 63%            | 79%        | 16%          |
|           | Honey v. Native Bee        | 55%            | 82%        | 27%          | 42%            | 68%        | 26%          |
|           | Fly or Bee                 | 73%            | 91%        | 18%          | 100%           | 100%       | 0%           |
|           | Wasp or Bee                | 73%            | 73%        | 0%           | 84%            | 68%        | -16%         |
|           | <b>Overall Mean (n=5)</b>  | <b>56%</b>     | <b>82%</b> | <b>25.6%</b> | <b>66%</b>     | <b>80%</b> | <b>13.6%</b> |
|           | SE                         | 0.08           | 0.04       | 7.93         | 0.12           | 0.06       | 10.05        |
| Eco Know  | Nesting Behavior           | 64%            | 100%       | 36%          | 21%            | 95%        | 74%          |
|           | Bee Features               | 55%            | 91%        | 36%          | 53%            | 89%        | 36%          |
|           | Pollination Services       | 55%            | 100%       | 45%          | 84%            | 100%       | 16%          |
|           | Ecosystem Functions        | 55%            | 73%        | 18%          | 74%            | 100%       | 26%          |
|           | Bee Population Declines    | 91%            | 100%       | 9%           | 74%            | 89%        | 15%          |
|           | <b>Overall Mean (n=5)</b>  | <b>64%</b>     | <b>93%</b> | <b>28.8%</b> | <b>61%</b>     | <b>95%</b> | <b>33.4%</b> |
|           | SE                         | 0.07           | 0.05       | 6.60         | 0.11           | 0.03       | 10.82        |
|           | <b>Overall Mean (N=10)</b> | <b>60%</b>     | <b>87%</b> | <b>27.2%</b> | <b>64%</b>     | <b>87%</b> | <b>23.5%</b> |
|           | SE                         | -              | -          | 4.90         | -              | -          | 7.72         |

Table S4. Insect Survey (2019)

| Abundance     |                                                                             | Experts |      |       |      | Students |      |       |      |
|---------------|-----------------------------------------------------------------------------|---------|------|-------|------|----------|------|-------|------|
|               |                                                                             | Sum     | Prop | Mean  | SE   | Sum      | Prop | Mean  | SE   |
| Insect Groups | Native bees                                                                 | 114     | 0.61 | 38.00 | 8.97 | 72       | 0.58 | 24.00 | 5.01 |
|               | Honey bees ( <i>Apis mellifera</i> )                                        | 47      | 0.25 | 15.67 | 7.32 | 26       | 0.22 | 8.67  | 4.49 |
|               | Butterflies                                                                 | 14      | 0.07 | 4.67  | 1.97 | 11       | 0.09 | 3.67  | 3.00 |
|               | Flies                                                                       | 7       | 0.04 | 2.33  | 0.98 | 7        | 0.06 | 2.33  | 1.51 |
|               | Wasps                                                                       | 6       | 0.03 | 2.00  | 0.82 | 7        | 0.06 | 2.33  | 1.09 |
| Bee Groups    | Honey bees ( <i>Apis mellifera</i> )                                        | 47      | 0.29 | 15.67 | 7.32 | 26       | 0.27 | 8.67  | 4.49 |
|               | Striped hairy belly leafcutter ( <i>Megachile</i> sp.)                      | 42      | 0.26 | 14.00 | 3.22 | 15       | 0.16 | 5.00  | 5.01 |
|               | Large carpenter bee ( <i>Xylocopa</i> 2 spp)                                | 25      | 0.16 | 8.33  | 1.46 | 6        | 0.06 | 2.00  | 1.53 |
|               | Hairy leg ( <i>Diadasia</i> sp., <i>Melissodes</i> sp., <i>Centris</i> sp.) | 23      | 0.14 | 7.67  | 2.40 | 3        | 0.03 | 1.00  | 0.58 |
|               | Bumble bee ( <i>Bombus pensylvanica</i> )                                   | 22      | 0.14 | 7.33  | 2.40 | 42       | 0.44 | 14.00 | 3.01 |
|               | Tiny dark bee ( <i>Lasioglossum</i> sp., <i>Ceratina</i> sp.)               | 1       | 0.01 | 0.33  | 0.34 | 1        | 0.01 | 0.33  | 0.34 |
|               | Cuckoo/parasitic bee ( <i>Coelioxys</i> sp.)                                | 1       | 0.01 | 0.33  | 0.34 | 0        | 0.00 | 0.00  | 0.00 |
|               | Striped abdomen plasterer (NA)                                              | 0       | 0.00 | 0.00  | 0.00 | 3        | 0.03 | 1.00  | 1.00 |
|               | Green bee (NA)                                                              | 0       | 0.00 | 0.00  | 0.00 | 2        | 0.02 | 0.67  | 0.66 |

Tables - *The Native Bees of Texas: Evaluating the benefits of a public engagement course*

**Table S5. General Perceived Knowledge: participant retrospective self-rating of overall perceived knowledge gains**

Mean ratings, on a 5-point Likert scale (1-poor to 5-excellent) per question across all participants, 2019 (n=20)

A Mann-Whitney U test assessed statistically significant differences from pre to post ratings (t-test p-value \*\*p<0.01)

Using a retrospective self-rating, "I would rate my knowledge of native bees as..."

| Retrospective Self-ratings | n  | Mean | SE   | p-value | Poor (1) | Fair (2) | Good (3) | Very Good (4) | Excellent (5) |
|----------------------------|----|------|------|---------|----------|----------|----------|---------------|---------------|
| Before/Pre                 | 20 | 1.65 | 0.21 | 0.000** | 60%      | 20%      | 15%      | 5%            | 0%            |
| Now/Post                   | 20 | 3.35 | 0.18 |         | 0%       | 10%      | 55%      | 25%           | 10%           |

**Table S6. Specific Perceived Knowledge: participant ratings of knowledge**

Mean ratings of six specific topics, on a 5-point Likert scale (1, Strongly disagree to 5, Strongly agree) per question across all participants, A. 2018 (n=12), B. 2019 (n=19)

"As a result of this course, I'm better able to ..."

| Specific Topics         | A. 2018 (n = 12) |      |     |     |     |     |     | B. 2019 (n = 19) |      |     |     |     |     |     |
|-------------------------|------------------|------|-----|-----|-----|-----|-----|------------------|------|-----|-----|-----|-----|-----|
|                         | Mean             | SE   | (1) | (2) | (3) | (4) | (5) | Mean             | SE   | (1) | (2) | (3) | (4) | (5) |
| Ecosystem Services      | 4.75             | 0.13 | 0%  | 0%  | 0%  | 25% | 75% | 4.58             | 0.12 | 0%  | 0%  | 0%  | 42% | 58% |
| Distinguish bee insects | 4.50             | 0.15 | 0%  | 0%  | 0%  | 50% | 50% | 4.26             | 0.13 | 0%  | 0%  | 5%  | 63% | 32% |
| Identify native bees    | 4.33             | 0.14 | 0%  | 0%  | 0%  | 67% | 33% | 4.00             | 0.15 | 0%  | 0%  | 21% | 58% | 21% |
| Taxonomy Diversity      | 4.33             | 0.14 | 0%  | 0%  | 0%  | 67% | 33% | 4.37             | 0.16 | 0%  | 0%  | 11% | 42% | 47% |
| Conservation            | 4.50             | 0.15 | 0%  | 0%  | 0%  | 50% | 50% | 4.74             | 0.10 | 0%  | 0%  | 0%  | 26% | 74% |
| Native bee plants       | 4.25             | 0.18 | 0%  | 0%  | 8%  | 58% | 33% | 4.53             | 0.14 | 0%  | 0%  | 5%  | 37% | 58% |
| Overall Mean (n=6)      | 4.44             | 0.07 | -   | -   | -   | -   | -   | 4.41             | 0.11 | -   | -   | -   | -   | -   |

**Table S7. Specific Topic Categories: Visual ID Skills and Ecological/conservation Knowledge (from Table S6 above)**

| ID Skills            | A. 2018     | B. 2019     | Eco/Conserve Know  | A. 2018     | B. 2019     |
|----------------------|-------------|-------------|--------------------|-------------|-------------|
| Distinguish insects  | 4.50        | 4.26        | Ecosystem services | 4.75        | 4.58        |
| Identify native bees | 4.33        | 4.00        | Conservation       | 4.50        | 4.74        |
| Taxonomy Diversity   | 4.33        | 4.37        | Native bee plants  | 4.25        | 4.53        |
| <b>Mean (n=3)</b>    | <b>4.39</b> | <b>4.21</b> | <b>Mean (n=3)</b>  | <b>4.50</b> | <b>4.62</b> |
| SE                   | 0.06        | 0.11        | SE                 | 0.14        | 0.06        |

**Table S8. Overall Course Ratings. "On a scale of 1 to 5, the class was..."**

Mean ratings, on a 5-point Semantic Differential Scale (1, Not at all to 5, Very much), expressed as percent of each criterion

| Criteria          | A. 2018 (n = 11) |            |     |     |     |     |      | B. 2019 (n = 19) |             |     |     |     |     |     |
|-------------------|------------------|------------|-----|-----|-----|-----|------|------------------|-------------|-----|-----|-----|-----|-----|
|                   | Mean             | SE         | (1) | (2) | (3) | (4) | (5)  | Mean             | SE          | (1) | (2) | (3) | (4) | (5) |
| Informative       | 5.00             | 0.0        | 0%  | 0%  | 0%  | 0%  | 100% | 4.95             | 0.05        | 0%  | 0%  | 0%  | 5%  | 95% |
| Useful            | 5.00             | 0.0        | 0%  | 0%  | 0%  | 0%  | 100% | 4.74             | 0.13        | 0%  | 0%  | 5%  | 16% | 79% |
| Engaging          | 5.00             | 0.0        | 0%  | 0%  | 0%  | 0%  | 100% | 4.26             | 0.17        | 0%  | 0%  | 16% | 42% | 42% |
| <b>Mean (n=3)</b> | <b>5.00</b>      | <b>0.0</b> | -   | -   | -   | -   | -    | <b>4.65</b>      | <b>0.20</b> | -   | -   | -   | -   | -   |

**Table S9. Applications of Acquired Knowledge.** 2018 (n=11), 2019 (n=19)

| Category                          | 2018, participants reported they intended to...                                                                                                                                                                                                                                                                                                                                                                                                                                                                  | 2019, participants reported they intended to...                                                                                                                                                                                                                                                                                                                                                                                                                                                         |
|-----------------------------------|------------------------------------------------------------------------------------------------------------------------------------------------------------------------------------------------------------------------------------------------------------------------------------------------------------------------------------------------------------------------------------------------------------------------------------------------------------------------------------------------------------------|---------------------------------------------------------------------------------------------------------------------------------------------------------------------------------------------------------------------------------------------------------------------------------------------------------------------------------------------------------------------------------------------------------------------------------------------------------------------------------------------------------|
| Gardening /<br>Land<br>Management | Increase diversity of bees in my backyard<br>Add bare ground<br>Keep more leaves on ground as mulch<br>Reduce use of insecticides<br>Grow pollinator garden<br>Plant native plants<br>Plant more native plants<br>Plant more bee-specific plants<br>Convert lawn to native Texas wildflower meadow                                                                                                                                                                                                               | Grow as much as I can from an apartment<br>Lawn and garden care and development<br>Build habitat / Home landscaping<br>Convert yard / Create to pollinator gardens<br>Plant flowers / bee-friendly plants<br>Increase flowers for native meadows / prairies<br>Increase bee-friendly wildflowers on ranch<br>Continue to establish native grasses/range science<br>Land management for pollinators<br>Identify what I have & plan to improve habitat<br>Document, increase number/variety bees on ranch |
| Education /<br>Projects           | Teach about native bee populations and behavior<br>Teach others & improve habitat<br>Project for UT course "Sustaining a Planet"                                                                                                                                                                                                                                                                                                                                                                                 | Share knowledge / ID photo project<br>Present basic info to clubs master gardeners<br>Continue work with Texas Master Naturalists<br>Teach Master Gardeners native bee habitat                                                                                                                                                                                                                                                                                                                          |
| SUMMARY                           | 82% apply acquired know/skills of native bee ecology/conservation in their garden or land management<br>26% apply acquired know/skills of native bee ecology/conservation to educational projects<br>18% expressed learning about solitary bee behavior helped understand & manage for native bees<br>18% highlighted importance of learning diversity & ID to distinguish between flower-visiting insects<br>9.5% underlined importance/application of improving native bee habitat for pollinator conservation |                                                                                                                                                                                                                                                                                                                                                                                                                                                                                                         |

Tables - *The Native Bees of Texas: Evaluating the benefits of a public engagement course*

Table S10. Effective Course Aspects

| Category                          | 2018 The best part of the course was...                                                                                                                                                                                                                                                                                                                                                         | 2019 The best part of the course was...                                                                                                                                                                                                                                                                                                                                           |
|-----------------------------------|-------------------------------------------------------------------------------------------------------------------------------------------------------------------------------------------------------------------------------------------------------------------------------------------------------------------------------------------------------------------------------------------------|-----------------------------------------------------------------------------------------------------------------------------------------------------------------------------------------------------------------------------------------------------------------------------------------------------------------------------------------------------------------------------------|
| Content Knowledge & Applicability | Identification & conservation of native bees<br>I didn't know that many bees were ground-nesters<br>Knowing how many bees nest in the ground, makes a huge difference in how I will garden in the future                                                                                                                                                                                        | All the good info./ All of it / Everything; it was great<br>I found I knew nothing before learning about bees<br>Knowing about all the types and sizes of bees<br>So much! Learning to distinguish bees/flies/wasps<br>Learning bee behavior / how to provide habitat<br>Understand/ realize native bees are mostly solitary<br>[You] don't need honey bees to improve ecosystems |
| Format / Instruction              | All parts were extremely useful<br>Nice mixture of lecture, lab, and field time<br>Presentation style with photos on screen<br>Learning from an expert<br>I thought the class was great                                                                                                                                                                                                         | Both, lectures & labs complemented learning process<br>Bee examples<br>Learning how to better teach this topic & how to provide habitat<br>Excellent instructor                                                                                                                                                                                                                   |
| Hands-on learning                 | Going outside<br>Exploring the Wildflower Center gardens<br>Being in the Wildflower Center<br>Learning more about native life                                                                                                                                                                                                                                                                   | I thought it was great seeing actual bees under scopes<br>Observations with scopes<br>Bee labs<br>Seeing actual bees                                                                                                                                                                                                                                                              |
| Resources                         | Hand-outs [printed material]<br>Bee photos [projected] on screen                                                                                                                                                                                                                                                                                                                                | Hand-outs<br>Slides of bees and Bee examples                                                                                                                                                                                                                                                                                                                                      |
| SUMMARY                           | 52% highlighted usefulness/applicability, 36% underlined behavior/ecology applications to conservation<br>42% appreciated excellent expert instructor (14% appreciated the presentation style & course format)<br>28% highlighted the hands-on learning, directly observing insects with scopes and in native gardens<br>14% found slides & printed educational material to be useful resources |                                                                                                                                                                                                                                                                                                                                                                                   |

Table S11. Suggested Course Improvements

| Category        | 2018 The course could be improved by ...                                                                                                 | 2019 The course could be improved by ...                                       |
|-----------------|------------------------------------------------------------------------------------------------------------------------------------------|--------------------------------------------------------------------------------|
| Duration & Pace | Longer time in the gardens<br>I wish the course were longer or a multi-segmented [course]<br>Increase time by a couple of hours          | Slower pace<br>Longer time for involvement<br>More field time                  |
| Instruction     | 1 student did not understand the scatterplot of bee abundance v. ground cover                                                            | Less detail on [bee] metamorphosis<br>Label & identify bees at scopes [better] |
| Topics          | Nothing that could have been done by the instructor<br>Suggest sharing more between participants<br>Talk more about plant identification |                                                                                |
| SUMMARY         | 21% suggested a longer workshop, more time in gardens, sharing more information among participants                                       |                                                                                |
