# Supplementary material for: The Native Bees of Texas: Evaluating the Benefits of a Public Engagement Course
Source: MDPI journal article supplement (doi:10.3390/insects12080702), 2021-08-05
Supplement: s1 [file s1]

**NATIVE BEES OF TEXAS COURSE FLOWER-VISITING INSECT SURVEY DATA SHEET 2019**

**YELLOW TEAM:** 3-year-expert (with J & S, students)

Start: 2:30 End: 2:45 p.m.

| INSECT                                                                                          | BEE GROUP                                                        | COUNT (tally e.g. IIII III) | SUM (e.g. 5) | TOTAL INSECT COUNTS      |
|-------------------------------------------------------------------------------------------------|------------------------------------------------------------------|-----------------------------|--------------|--------------------------|
| BEE<br>Little or no hair on<br>underside of abdomen<br><br>(pollen on leg hair or<br>elsewhere) | Honey bee ( <i>Apis mellifera</i> )                              | IIII IIII IIII IIII IIII    | 30           |                          |
|                                                                                                 | Bumble bee ( <i>Bombus</i> )                                     | IIII IIII II                | 12           |                          |
|                                                                                                 | Large carpenter bee ( <i>Xylocopa virginica</i> )                | IIII IIII I                 | 11           |                          |
|                                                                                                 | Hairy leg/Longhorn ( <i>Centris</i> )                            | IIII III                    | 8            | 11 Hairyleg/longhorn     |
|                                                                                                 | Hairy leg/Longhorn                                               | III                         | 3            |                          |
|                                                                                                 | Green sweat bee ( <i>Agapostemon</i> )                           |                             | 0            |                          |
|                                                                                                 | Striped sweat bee ( <i>Halictus</i> )                            |                             | 0            |                          |
|                                                                                                 | Tiny dark bee ( <i>Lasioglossum</i> Hal./ <i>Ceratina</i> Apid.) | I                           | 1            |                          |
|                                                                                                 | Striped abdomen - miner                                          |                             | 0            |                          |
|                                                                                                 | Striped abdomen - plasterer                                      |                             | 0            |                          |
| Brush of hair<br>under abdomen<br>carries pollen                                                | Striped abdomen - oil-collector                                  |                             | 0            |                          |
|                                                                                                 | Hairy belly bee / striped leafcutter                             | IIII IIII IIII IIII         | 19           |                          |
|                                                                                                 | Metallic hairy belly bee – mason ( <i>Osmia</i> )                |                             | 0            |                          |
|                                                                                                 |                                                                  |                             | 0            |                          |
| No hair                                                                                         | Cuckoo/parasitic bee                                             |                             | 0            |                          |
|                                                                                                 | Unidentified native bee                                          |                             | 0            |                          |
|                                                                                                 | 7 Bee species, 6 Native bee species                              | BEE COUNT                   | 84           | 84 Bees – 30 HB = 54 NB  |
| NON-BEE                                                                                         | Fly ( <i>Bombyliidae</i> )                                       | III                         | 3            |                          |
|                                                                                                 | Wasp                                                             | IIII                        | 4            |                          |
|                                                                                                 | UFI                                                              |                             | 0            |                          |
|                                                                                                 | 2 species non-bee insects                                        | NON-BEE COUNT               | 7            | 7 non-bees of 91 insects |
|                                                                                                 | 9 species flower-visiting insects                                | INSECT COUNT                | 91           | 84 bees of 91 insects    |

NATIVE BEES OF TEXAS COURSE FLOWER-VISITING INSECT SURVEY DATA SHEET 2019

**YELLOW TEAM:** Observer-Recorder Names: J & S (with 3-year expert)

Start: 2:30 End: 2:45 p.m.

| INSECT                                                                                          | BEE GROUP                            | COUNT (tally e.g. ### III) | SUM (e.g. 5) | TOTAL INSECT COUNTS      |
|-------------------------------------------------------------------------------------------------|--------------------------------------|----------------------------|--------------|--------------------------|
| BEE<br>Little or no hair on<br>underside of abdomen<br><br>(pollen on leg hair or<br>elsewhere) | Honey bee ( <i>Apis mellifera</i> )  | ### ### †                  | 11           |                          |
|                                                                                                 | Bumble bee                           | ### III                    | 8            |                          |
|                                                                                                 | Large carpenter bee                  | ###                        | 5            |                          |
|                                                                                                 | Hairy leg bee / Longhorn             | II                         | 2            |                          |
|                                                                                                 | Green sweat bee                      |                            | 0            |                          |
|                                                                                                 | Striped sweat bee                    |                            | 0            |                          |
|                                                                                                 | Tiny dark bee                        | I                          | 1            |                          |
|                                                                                                 | Striped abdomen - miner              |                            | 0            |                          |
| Brush of hair<br>under abdomen<br>carries pollen                                                | Striped abdomen - plasterer          | III                        | 3            |                          |
|                                                                                                 | Striped abdomen - oil-collector      |                            | 0            |                          |
|                                                                                                 | Hairy belly bee / striped leafcutter | ### ### ###                | 15           |                          |
|                                                                                                 | Metallic hairy belly bee             |                            | 0            |                          |
| No hair                                                                                         | Cuckoo bee / parasitic bee           |                            | 0            |                          |
|                                                                                                 | Unidentified native bee              |                            | 0            |                          |
| 7 Bee species, 6 Native bee species                                                             |                                      | BEE COUNT                  | 45           | 45 Bees – 11 HB = 34 NB  |
| NON-BEE                                                                                         | Flies                                |                            | 0            |                          |
|                                                                                                 | Wasps                                | I                          | 1            |                          |
|                                                                                                 | Butterflies/Moths                    |                            | 0            |                          |
|                                                                                                 | UFI                                  |                            |              |                          |
| 1 species non-bee insects                                                                       |                                      | NON-BEE COUNT              | 1            | 1 non-bees of 46 insects |
| 8 species flower-visiting insects                                                               |                                      | INSECT COUNT               | 46           | 45 bees of 46 insects    |
