# Supplementary material for: The Native Bees of Texas: Evaluating the Benefits of a Public Engagement Course
Source: MDPI journal article supplement (doi:10.3390/insects12080702), 2021-08-05
Supplement: s1 [file s1]

**Scheme S1.**

**Classroom instruction and educational material demos**

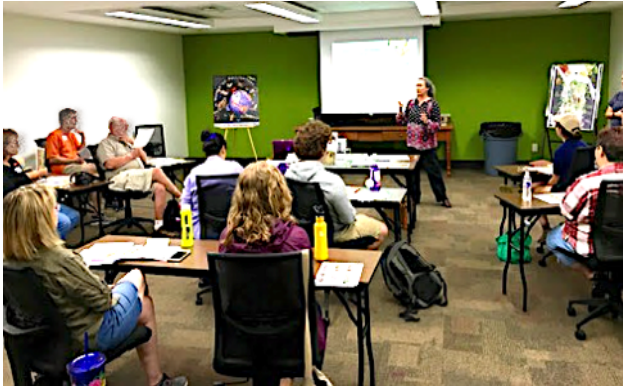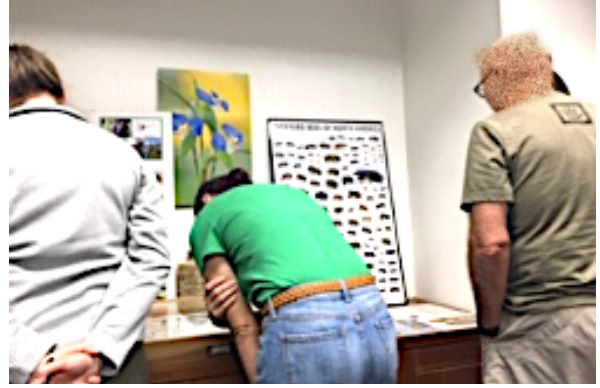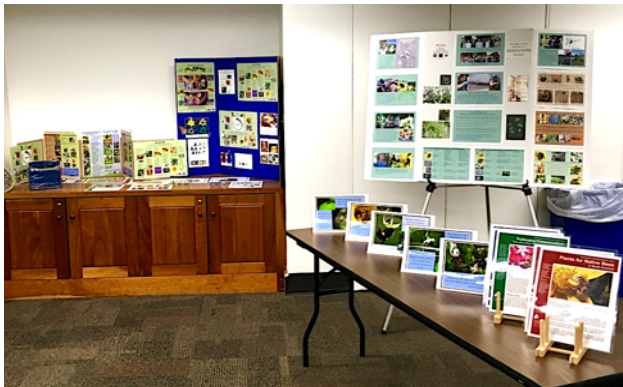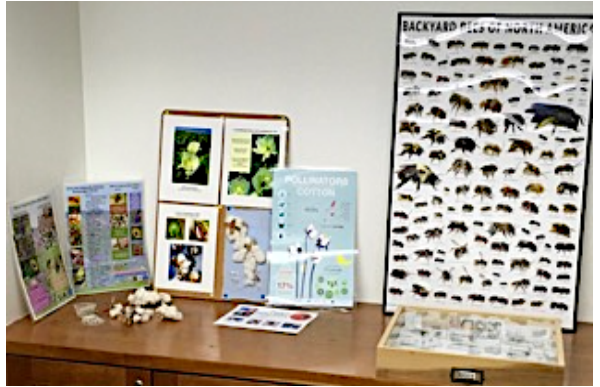

**Lab layout: Stereo microscopes and loupes with pinned insects and labeled photos**

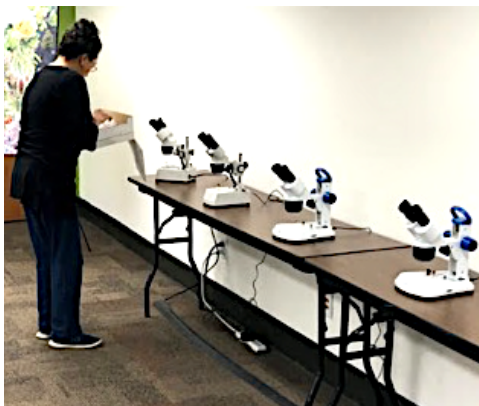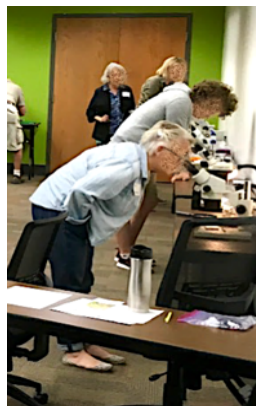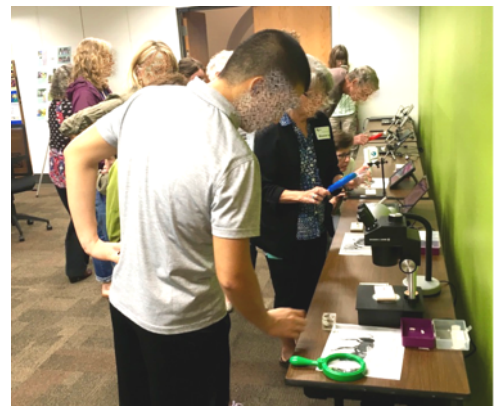

Photos Carlos Torres Verdín

**Scheme S2 A-I. Educational material supplemented each lecture and lab topic (in parenthesis)**

- |                                       |                                                                         |
|---------------------------------------|-------------------------------------------------------------------------|
| A. Bee family cladogram               | (Evolutionary classification of 6 North American bee families)          |
| B. Bee family/common name table       | (Taxonomy of native bees, from common to uncommon in Texas)             |
| C. Bee ID Guide for Central Texas     | (ID/diversity, lab & field observations)                                |
| D. Bees of Central Texas Gardens      | (ID/diversity, field observation. Most common bees in C. TX gardens)    |
| E. Bees of the Wildflower Center      | (ID/diversity, field observation of bees on-site native landscapes)     |
| F. Tips to Improve Native Bee Habitat | (Best management practices to conserve native bee habitat)              |
| G. Pollinator Habitat Conservation    | (Guidelines to manage and conserve native pollinator habitat)           |
| H. TX Prairie Plants for Native Bees  | (Top ten native plant families, genera, & species / bee food resources) |
| I. Native Landscapes for Native Bees  | (Tips for establishing native plant landscapes for bee food & nesting)  |

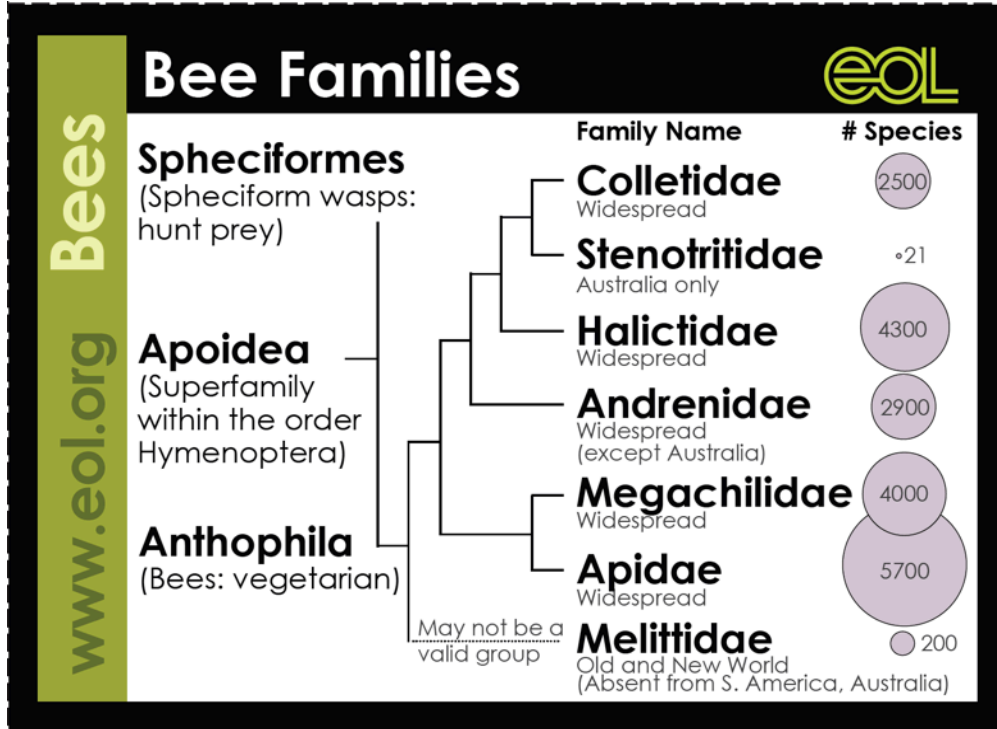

S2A

Rykken & Holmes Encyclopedia of Life [https://education.eol.org/observer\\_cards/bee\\_cards\\_ebook.pdf](https://education.eol.org/observer_cards/bee_cards_ebook.pdf)

**Bee Families in Texas and North America**

| Long-tongued   |              |             | Short-tongued |                          |                |
|----------------|--------------|-------------|---------------|--------------------------|----------------|
| APIDAE         | MEGACHILIDAE | HALICTIDAE  | ANDRENIDAE    | COLLETIDAE               | MELITTIDAE     |
| Bumble         | Leafcutters  | Sweat:      | Miners:       | Plasterers               | Oil-collectors |
| Carpenters     | Carders      | - tiny dark | - small       | Cellophane/<br>Polyester | Cuckoos        |
| Longhorn       | Masons       | - striped   | - large       | Cuckoos                  |                |
| Diggers/Miners | Cuckoos      | - green     |               |                          |                |
| Sunflower      |              | Alkali      |               |                          |                |
| Cactus         |              | Cuckoos     |               |                          |                |
| Squash         |              |             |               |                          |                |
| Honey bee      |              |             |               |                          |                |
| Cuckoos        |              |             |               |                          |                |

S2B

Note: Long or short tongued are relative terms (see references 1, 2, 3 below)

## S2C. Bees of Central Texas Guide (ID/diversity, lab/field observations) (4-page document)

|                                                                                                                                                                                                                                                                                                                                                                                                                                                                                                               |                                                                                                                                                                                                                                                                                                                                                                                                                                                                                                                                                                  |
|---------------------------------------------------------------------------------------------------------------------------------------------------------------------------------------------------------------------------------------------------------------------------------------------------------------------------------------------------------------------------------------------------------------------------------------------------------------------------------------------------------------|------------------------------------------------------------------------------------------------------------------------------------------------------------------------------------------------------------------------------------------------------------------------------------------------------------------------------------------------------------------------------------------------------------------------------------------------------------------------------------------------------------------------------------------------------------------|
| <p><b>Bumble Bees</b> <i>Bombus</i> spp. <i>Apidae</i></p> <p><b>Size:</b> medium to very large. <b>Shape:</b> robust, bombiform</p> <p><b>Color:</b> black with wide yellow bands</p> <p><b>Hair:</b> covers entire body; <i>corbicula</i> on legs carry moist pollen</p> <p><b>Behavior:</b> make low buzzing sound when flying, polylectic</p> <p><b>Nesting:</b> social, largely ground nesters</p>                      | <p><b>Hairy-legged (digger, miner, chimney, longhorn)</b> <i>Apidae</i></p> <p><b>Size:</b> small-medium-large. <b>Shape:</b> robust, rounded, euceriform</p> <p><b>Color:</b> striped abdomen. <b>Other:</b> males may have long antennae</p> <p><b>Hair:</b> short, dense, velvety, brush of hair on leg or whole body</p> <p><b>Behavior:</b> fly quickly and smoothly, oligolectic to polylectic</p> <p><b>Nesting:</b> solitary to communal ground nesters</p>            |
| <p><b>Large Carpenter Bees</b> <i>Xylocopa</i> spp. <i>Apidae</i></p> <p><b>Size:</b> very large. <b>Shape:</b> robust, bombiform</p> <p><b>Color:</b> shiny black/dark blue abdomen</p> <p><b>Hair:</b> brush of hair on thorax, hind legs' <i>corbicula</i> carry pollen</p> <p><b>Behavior:</b> territorial males may buzz by you, polylectic</p> <p><b>Nesting:</b> solitary cavity nesters, nest in soft wood</p>       | <p><b>Striped Hairy Belly Bee (leafcutter, carders)</b> <i>Megachilidae</i></p> <p><b>Size:</b> small to medium. <b>Shape:</b> slender to robust, megachiliform</p> <p><b>Color:</b> black with silvery hairs, white stripes on abdomen</p> <p><b>Hair:</b> brushes on abdomen underside may transport pollen</p> <p><b>Behavior:</b> may raise abdomen while visiting flowers, polylectic</p> <p><b>Nesting:</b> solitary cavity nesters, may line nest with leaves/hair</p>  |
| <p><b>Small Carpenter Bees (tiny dark)</b> <i>Ceratina</i> spp. <i>Apidae</i></p> <p><b>Size:</b> tiny. <b>Shape:</b> slender, hylaeiform</p> <p><b>Color:</b> dark blue-green, metallic, some have white face marks</p> <p><b>Hair:</b> hairless except brushes of hair on hind leg carry pollen</p> <p><b>Behavior:</b> fast jagged flight, polylectic</p> <p><b>Nesting:</b> solitary to semi-social, cavity nesters</p>  | <p><b>Metallic Hairy Belly Bee (masons)</b> <i>Osmia</i> spp. <i>Megachilidae</i></p> <p><b>Size:</b> small to medium. <b>Shape:</b> stout, rounded, megachiliform</p> <p><b>Color:</b> metallic green, blue, or blue-black</p> <p><b>Hair:</b> brushes beneath abdomen carry pollen</p> <p><b>Behavior:</b> observed in spring-early summer, polylectic</p> <p><b>Nesting:</b> solitary gregarious cavity nesters</p>                                                         |

<http://w3.biosci.utexas.edu/jha/wp-content/uploads//Texas-Bee-ID-Guide.pdf>

## S2D. Bees of Central Texas Gardens (ID/diversity, most common native bees in Central TX gardens)

w3.biosci.utexas.edu/jha/about-native-bees





1



3  
John Ascher 2009



2



4



5



6  
Laurel Treviño photos Kim Ballare text



6

**Native Bees in Central Texas Gardens & Farms**

1. Bumble bee (*Bombus*) the most common
2. Tiny sweat bee (*Lasioglossum*) most common
3. Longhorn bee (*Melissodes*) very common
4. Large carpenter bee (*Xylocopa*) common
5. Green sweat bee (*Agapostemon*) common
6. Leaf cutter bee (*Megachile*) less common

<http://w3.biosci.utexas.edu/jha/wp-content/uploads//TX-Garden-Native-Bees.pdf>

## S2E. Local bee fauna - ID guide for bees of UT-LBJWC botanical garden

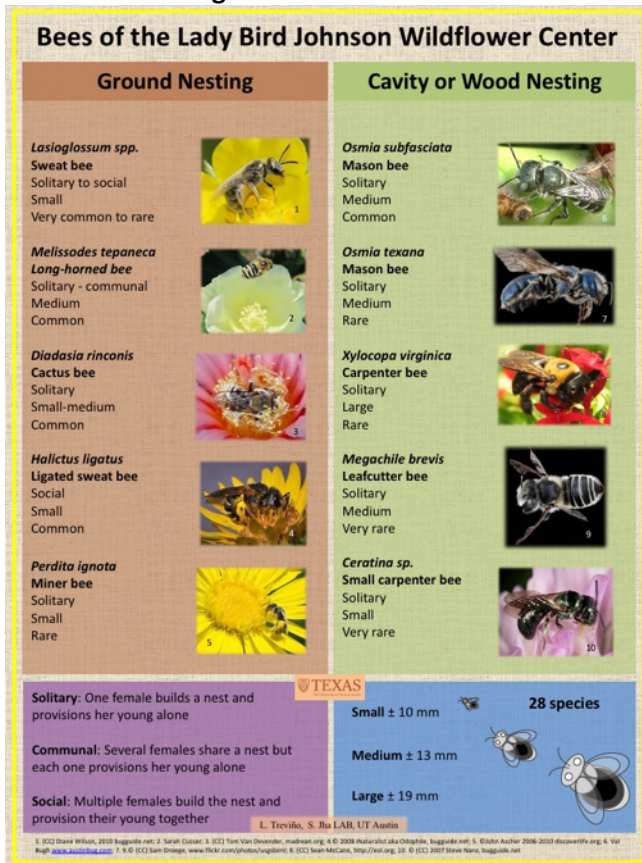

## S2F. Best management practices (BMP) for native bee habitat conservation

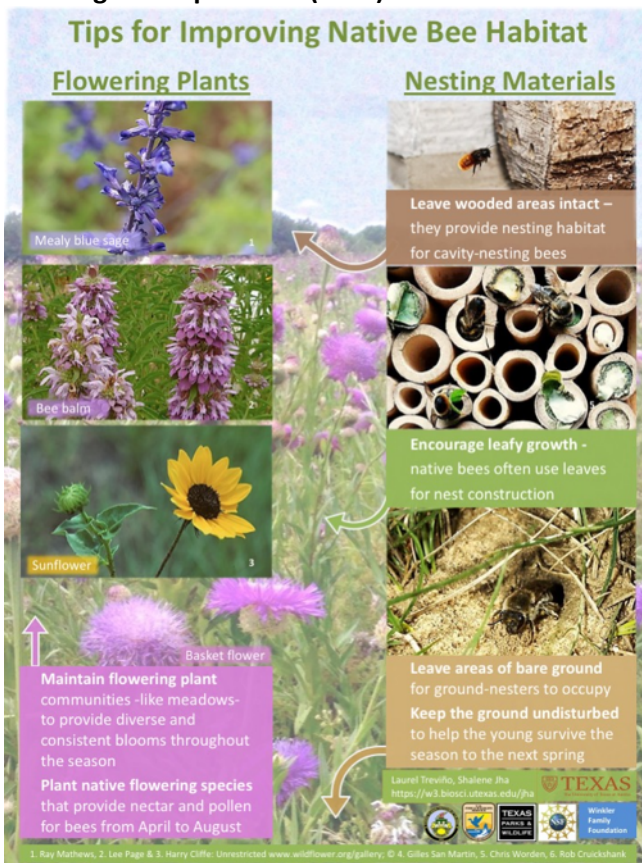

<http://w3.biosci.utexas.edu/jha/wp-content/uploads//Native-Pollinator-Habitat.jpg>

## S2G. Pollinator Habitat Conservation Guidelines (2-sided pamphlet)

### Threats to Pollinators

- Habitat loss
- Pesticides
- Diseases
- Climate change

### How You Can Help

**Provide food & water:** Bees depend on nectar and pollen. Native bees prefer native plant pollen. Provide abundant and diverse native plants from spring through fall.

**Conserve nest habitat:** bare ground & cavities

**Prevent:** soil erosion & compaction

**Reduce:** pesticide use

### Pollinator Habitat Management

Thanks to Texas Parks and Wildlife Department initiatives, landowners may now receive tax incentives by managing pollinator habitat. TPWD outlines Pollinator Habitat Conservation practices\* to help landowners qualify for agriculture-wildlife tax valuation through their county appraisal district. A landowner must implement at least three habitat management practices such as pollinator surveys. The Jha Lab can help interpret data from pollinator surveys to inform landowners of best management practices (Landowners/Naturalists webpage).

<http://w3.biosci.utexas.edu/jha/wp-content/uploads/Landowners/Naturalists.pdf>

\* [http://tpwd.texas.gov/huntwild/wild/wildlife\\_diversity/nongame/native-pollinators/media/TPWD-Native-Pollinator-Management.pdf](http://tpwd.texas.gov/huntwild/wild/wildlife_diversity/nongame/native-pollinators/media/TPWD-Native-Pollinator-Management.pdf)

### Native Pollinators Thrive in Native Landscapes



## Pollinator Habitat Conservation



Laurel Treviño, M.S. & Shalene Jha, Ph.D.

The University of Texas at Austin  
Department of Integrative Biology  
College of Natural Sciences

### Plants & Native Bees

~87% of flowering plants rely on animal pollinators to set fruit. There are 4,000 bee species in North America; 800+ of them in Texas alone. Native bees originated in and are adapted to local climate, soils, and native plants. Non-native species like the Western honeybee were introduced from Europe and became naturalized here.



### Bee-pollinated Crop Species

Almonds, apples & blueberries depend on bee pollination. Watermelons, melons and squash are often pollinated by native squash bees. Peppers, tomatoes and potatoes are often buzz pollinated by native bumble bees. Leafcutter bees pollinate alfalfa more efficiently than European/Western honeybees do.

**Pollination services give us 1 in 3 food morsels!**

~35% of U.S. crop species rely on insect pollination. Bees boost US crop production by ~\$15 billion/year with ~\$3 billion attributed to native bees. Studies in Texas show that insect mediated cross-pollination boosts cotton yield by 17%!

### Native Bee Habitat

~75% of native bees are ground-nesters: digger bees, bumble bees, and sweat bees. If soil is deeply tilled, eroded or compacted their nests are destroyed. Leave bare ground for native bee nests!



Tom Murray

~25% of native bees are cavity-nesters: carpenter bees, mason bees and leaf cutters make nests in soft wood, plant stems, rock crevices or snail shells. Nest sites are scarcer as native woodlands decrease. Leave snags, logs and thatch for nests!



Alan C. Scott Famous

~90% of native bees are solitary. A female bee lays eggs on pollen balls she makes in her nest; larvae consume this bee bread to develop into pupa and then adults.

### Hundreds of butterfly and bee species inhabit Central Texas



- Sweet Bees
  - Green: *Agapostemon* (2 species)
  - Agapostemon* *metallica*
  - Striped: *Halictus* *ligatus*
  - Dark: *Lasiopterus* (6 species)
- Mining & Digger Bee
  - Andrena* *rupestris*
  - Centris* *atropis*
- Chimney Bees
  - Ancylotus* *apiformis*
  - Diadasia* (2 species)
- Plasterer Bee
  - Colletes* *texanus*
- Longhorn Bee
  - Melissodes* (4 species)
- American Bumblebees
  - Bombus* *pennsylvanicus*
- Squash Bee
  - Peponapis* *pruinosa*
- Sunflower Bee
  - Xylocopa* (3 species)
- Small Carpenter Bees
  - Cervinus* (3 species)
- Mason Bees
  - Heriades* *variabilis*
  - Osmia* *subfasciata*
- Leafcutter Bees
  - Megachile* (6 species)
- Cuckoo Bee
  - Tripeplus* *concolor*
- Skipper Butterflies
  - Euphyes* *vestris* (Dawn Skipper)
  - Lerema* *oculus* (Clouded Skipper)
  - Lerema* *rudis* (Eufala Skipper)
- Brushfooted Butterfly
  - Junonia* *coenia* (Buckeye)
- Sulphur Butterfly
  - Pyralis* *fla* (Small Sulphur)
- Swallowtail Butterfly
  - Battus* *philenor* (Pipevine Swallowtail)

<http://w3.biosci.utexas.edu/jha/wp-content/uploads//Pollinator-Habitat-Conservation.pdf>

**S2H. Central Texas prairie plants visited by native bees (2 pp. top 10 native plant families, genera, species)**

| Texas prairie plants for native bees                                                                                                                         |                                                                                                               |                                                                                                                           |                                                                                                |
|--------------------------------------------------------------------------------------------------------------------------------------------------------------|---------------------------------------------------------------------------------------------------------------|---------------------------------------------------------------------------------------------------------------------------|------------------------------------------------------------------------------------------------|
|                                                                                                                                                              | Family                                                                                                        | Common Name                                                                                                               | Scientific Name                                                                                |
|  <small>(CC) Bob Peterson<br/>Wikimedia Commons</small>                     | <b>Asteraceae</b><br>Aster/daisy<br><small>(most plant species,<br/>most bee species &amp; abundance)</small> | Fire wheel, Indian blanket<br>Texas thistle<br>Mexican hat<br>Golden wave                                                 | Gaillardia pulchella<br>Cirsium texanum<br>Ratibida columnifera<br>Coreopsis basalis           |
|  <small>Lee Page,<br/>Lady Bird Johnson<br/>Wildflower Center</small>       | <b>Lamiaceae</b><br>Mints<br>Sages                                                                            | Beebalm/Wild bergamont<br>Blue/azure sage, pitcher sage<br>Drummond's skullcap<br>Mock pennyroyal/limoncillo              | Monarda citriodora<br>Salvia azurea, S. texana<br>Scutellaria drummondii<br>Hedeoma drummondii |
|  <small>R.W. Smith,<br/>Lady Bird Johnson<br/>Wildflower Center</small>     | <b>Fabaceae</b><br>Legumes                                                                                    | Purple prairie clover<br>Golden, yellow prairie clovers<br>Nuttall's sensitive briar<br>Yellow puff sensitive briar       | Dalea purpurea<br>D. aurea, D. nana<br>Mimosa nuttallii<br>Neptunia lutea                      |
|  <small>Laurel Treviño</small>                                              | <b>Asclepiadaceae</b><br>Milkweeds                                                                            | Spider milkweed/antelope<br>horns; green; green-flowered;<br>pink/swamp milkweed<br>(Not tropical <i>A. curassavica</i> ) | Asclepias asperula,<br>A. viridis, A. viridiflora,<br>A. incarnate                             |
|  <small>Margaret Reed,<br/>Lady Bird Johnson<br/>Wildflower Center</small> | <b>Solanaceae</b><br>Nightshades                                                                              | Nightshade<br>Tomato weed<br>Buffalo bur nightshade                                                                       | Solanum melongena<br>Solanum elaeagnifolium<br>Solanum rostratum                               |

<http://w3.biosci.utexas.edu/jha/wp-content/uploads//TX-Prairie-Plants-Native-Bees.pdf>

**S2I. Tips for establishing native plant landscapes for bee food and nesting resources (1 p.)**

### Native Landscapes for Native Bees

Pollinator habitat should provide resources for food and nesting.

Native bees prefer native plants over non-native plants, except when invasive plants outcompete native congeners (same genus).

Bees love mints (beebalm, sage), legumes (bluebonnet, acacia), and asters (daisy, sunflower). Build on a garden scaffold made of these plants.

Group colors and aromas in large patches or strips of the same plant species.

Plant diversity sustains bee diversity. A diverse garden, blooming spring through fall, will attract many species of bees and sustain a healthy pollinator community.

Relay planting periods for staggered blooming periods throughout the season.

Mix perennial (long-lived) and annual (short-lived) plants in a pollinator garden.

Laurel Treviño, M.S., Shalene Jha, Ph.D.



The University of Texas at Austin  
Department of Integrative Biology  
College of Natural Sciences

**Scheme S3. Insect Labs A & B – view specimens on display with scopes & loupes**

**A. Distinguish Between Flower-Visiting Insects: Bees & Look-alikes**

Flies: house fly, bombyliid fly (*Bombyliidae*), hoverfly (*Syrphidae*)

Wasp (Mexican honey wasp, flower wasp, paper wasp)

Hairy belly / Carder leafcutter bee (*Dianthidium* sp.)

Honey bee (*Apis mellifera*, *Apidae*)

**B. Observe Native Bees in 4 of 6 North American/Texas Families**

Bumble bee (*Bombus* sp., *Apidae*)

Large carpenter bee (*Xylocopa* sp., *Apidae*)

Tiny dark / Small carpenter bee (*Ceratina* sp., *Apidae*)

Hairy leg / Longhorn bee (*Melissodes* sp., *Apidae*)

Hairy leg / Sunflower / Cactus bee (*Diadasia* sp., *Apidae*)

Metallic, hairy belly / Mason (*Osmia* sp., *Megachilidae*)

Carder / leafcutter bee (*Dianthidium* sp., *Megachilidae*)

Hairy belly / Leafcutter bee (*Megachile* sp., *Megachilidae*)

Tiny dark sweat bee (*Lasioglossum* sp., *Halictidae*)

Striped sweat bee (*Halictus* sp., *Halictidae*)

Green sweat bee (*Agapostemon* sp., *Halictidae*)

Striped-abdomen, miner bee (*Perdita* sp., *Andrenidae*)

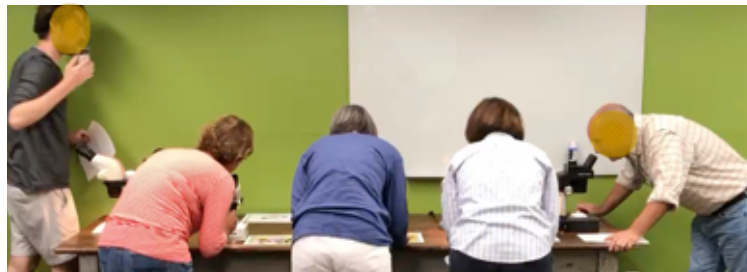

**Scheme S4. Insect Labs - Example specimens of flower-visiting insects observed with scopes and loupes**

**FLIES (*Syrphidae* & *Bombyliidae*)**

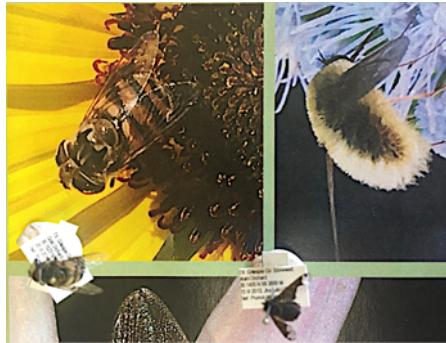

**(*Syrphidae*)**

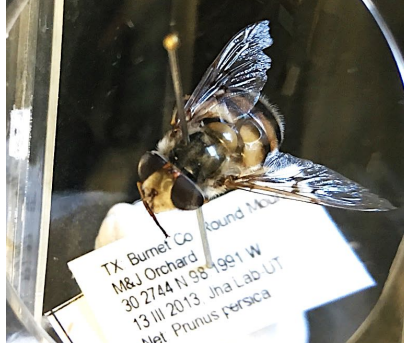

**(*Tachinidae* house fly)**

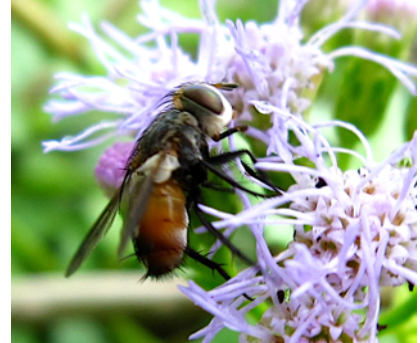

**WASPS (Flower wasp)**

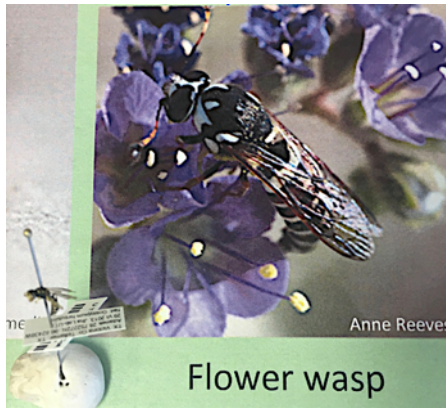

**(Paper wasp, right)**

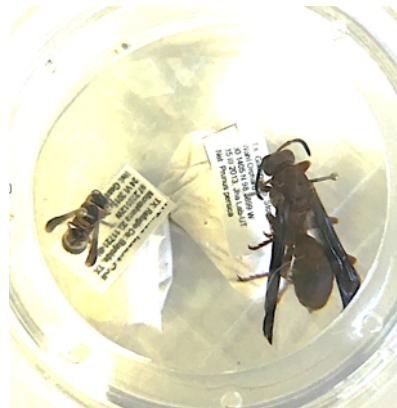

**(Mexican honey wasp)**

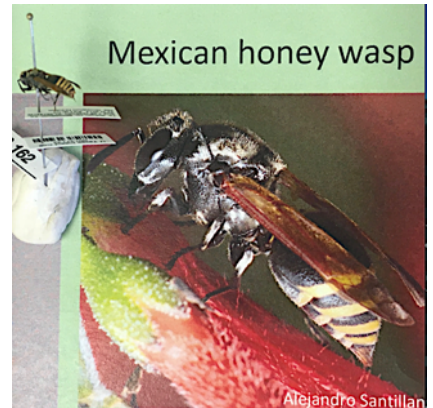

**BEES (native leafcutter)**

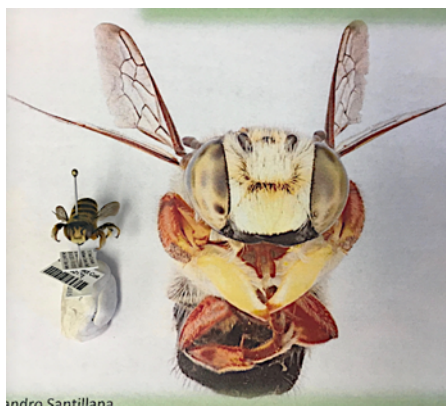

**(native green sweat bees, m. f.)**

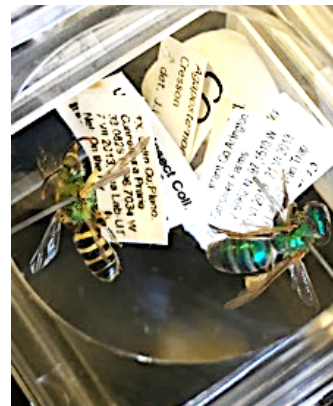

**(Honey bee, *Apis mellifera*)**

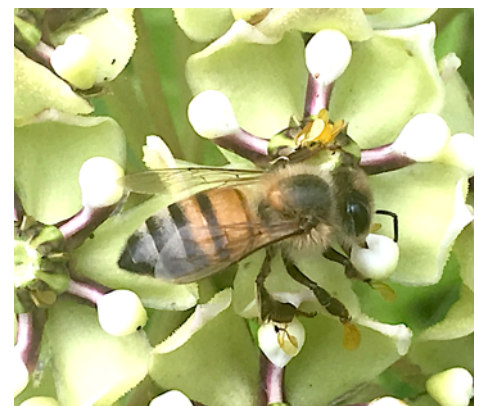

## Scheme S5

### 5A. Fixed Route Survey - Instructions & Implementation

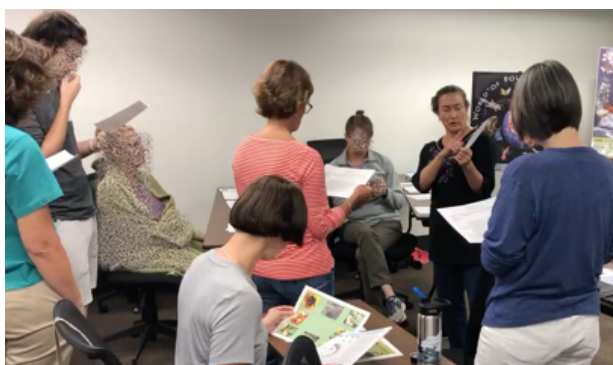

photo Carlos Torres Verdín

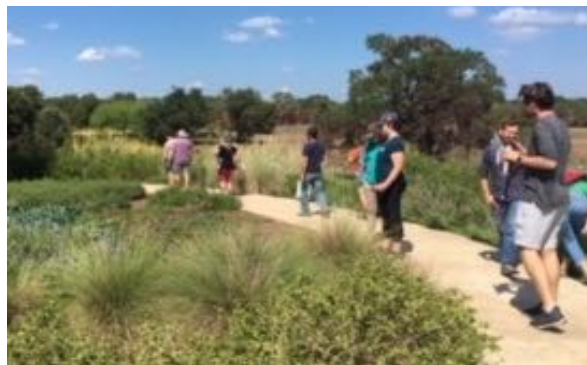

photo Shelly Engelman

Fixed Route Survey (80 m x 2 m), walk at a steady pace in one direction for 15 minutes  
Identify & count insects on/in flowers only once, record observations on data sheet

### 5B. Data Sheet for Flower-visiting Insect Survey (Fixed Route)

Observer-Recorder Pair Names: \_\_\_\_\_

Teamed with Expert (name): \_\_\_\_\_

Team Color (circle one): RED, BLUE, YELLOW

Start time: \_\_\_\_\_ am/pm End time: \_\_\_\_\_ am/pm

| INSECT                                                                                             | BEE GROUP                           | COUNT (### III) | SUM |
|----------------------------------------------------------------------------------------------------|-------------------------------------|-----------------|-----|
| BEE<br>Little or no hair<br>on underside of<br>abdomen<br><br>(pollen on leg hair<br>or elsewhere) | Honey bee ( <i>Apis mellifera</i> ) |                 |     |
|                                                                                                    | Bumble bee                          |                 |     |
|                                                                                                    | Large carpenter bee                 |                 |     |
|                                                                                                    | Hairy leg bee / longhorn            |                 |     |
|                                                                                                    | Green sweat bee                     |                 |     |
|                                                                                                    | Striped sweat bee                   |                 |     |
|                                                                                                    | Tiny dark bee                       |                 |     |
|                                                                                                    | Striped abdomen - miner             |                 |     |
| Brush of hair<br>under abdomen<br>carries pollen                                                   | Striped abdomen - plasterer         |                 |     |
|                                                                                                    | Striped abdomen - oil-collector     |                 |     |
|                                                                                                    | Hairy belly bee / leafcutter        |                 |     |
|                                                                                                    | Metallic hairy belly bee            |                 |     |
| No hair                                                                                            | Cuckoo bee / parasitic bee          |                 |     |
|                                                                                                    | Unidentified native bee             |                 |     |
|                                                                                                    | (HB: honey bee, NB: native)         | BEE COUNT       |     |
| NON-BEE                                                                                            | Flies                               |                 |     |
|                                                                                                    | Wasps                               |                 |     |
|                                                                                                    | Butterflies/Moths                   |                 |     |
|                                                                                                    | Unidentified insect                 |                 |     |
|                                                                                                    |                                     | NON-BEE INSECTS |     |
|                                                                                                    |                                     | ALL INSECTS     |     |

<http://w3.biosci.utexas.edu/jha/wp-content/uploads//Pollinator-Habitat-Surveys.pdf>

Schema S6A. Life history and pollination topics covered in presentations & activities

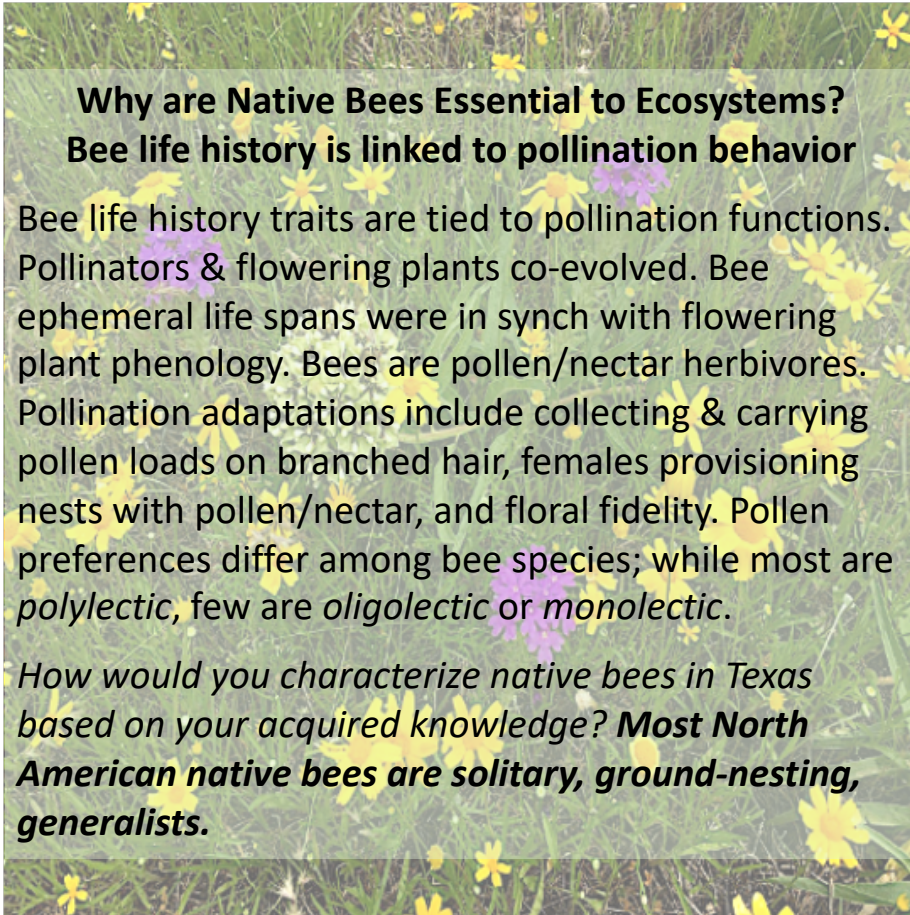

**Why are Native Bees Essential to Ecosystems?**  
**Bee life history is linked to pollination behavior**

Bee life history traits are tied to pollination functions. Pollinators & flowering plants co-evolved. Bee ephemeral life spans were in synch with flowering plant phenology. Bees are pollen/nectar herbivores. Pollination adaptations include collecting & carrying pollen loads on branched hair, females provisioning nests with pollen/nectar, and floral fidelity. Pollen preferences differ among bee species; while most are *polylectic*, few are *oligolectic* or *monolectic*.

*How would you characterize native bees in Texas based on your acquired knowledge? **Most North American native bees are solitary, ground-nesting, generalists.***

S6B. Life History & Behavior

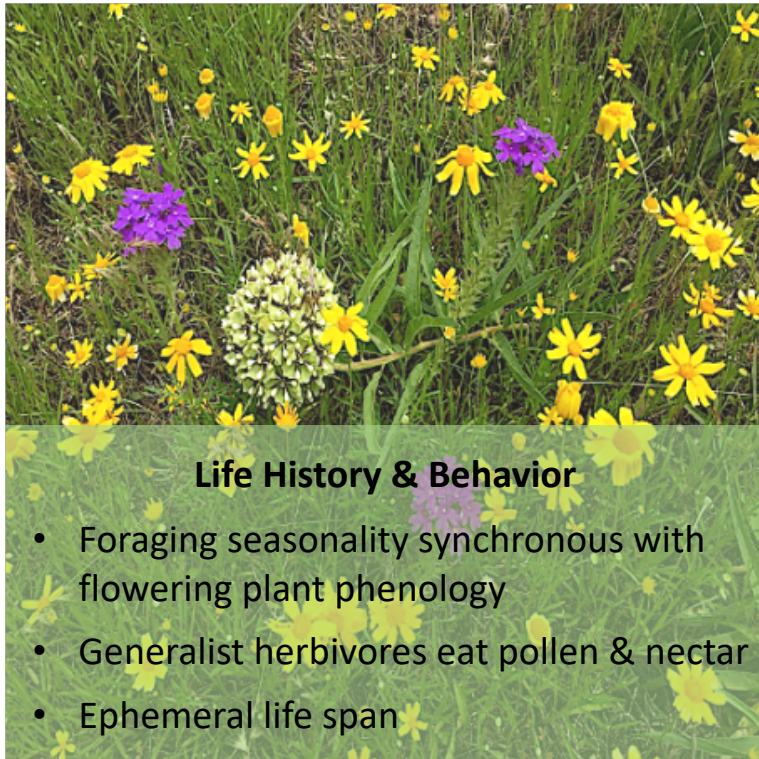

**Life History & Behavior**

- Foraging seasonality synchronous with flowering plant phenology
- Generalist herbivores eat pollen & nectar
- Ephemeral life span

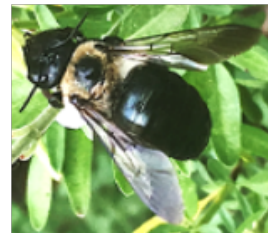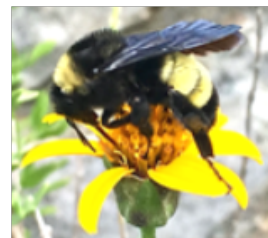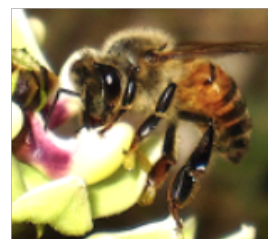

### S6C. Pollination Adaptations

#### Pollination Adaptation

- Branched hair carries pollen loads
- Females collect pollen for brood
- Floral fidelity / Foraging constancy

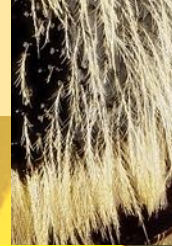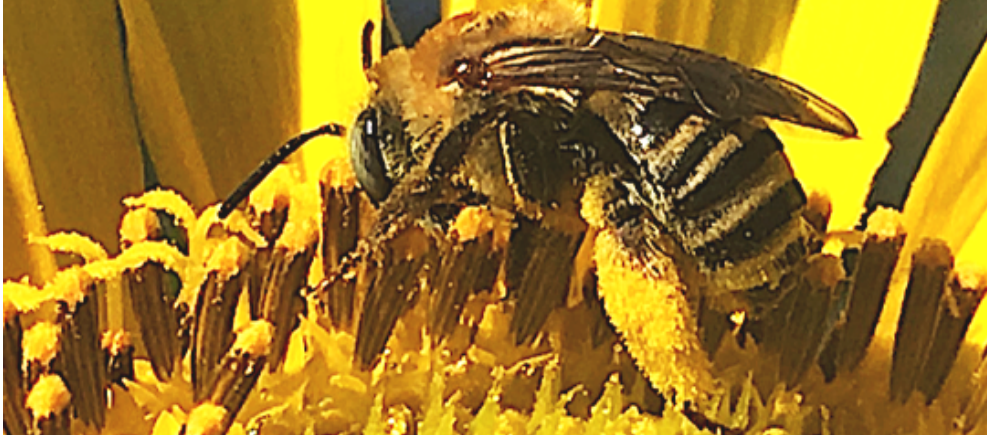

hairy-legged  
sunflower bee

#### Diet & Behavior

- Floral fidelity facilitates pollination
- Pollen preference  
polylectic ~ generalist, oligolectic ~ specialist

### S6D. Nesting Behavior & Sociality

#### Nesting Behavior - Sociality

Females make & provision nest with pollen/nectar

Nesting substrates - Ground (~75% spp) Cavity (~25% spp)

Sociality Gradient - 90% solitary, 10% communal or social

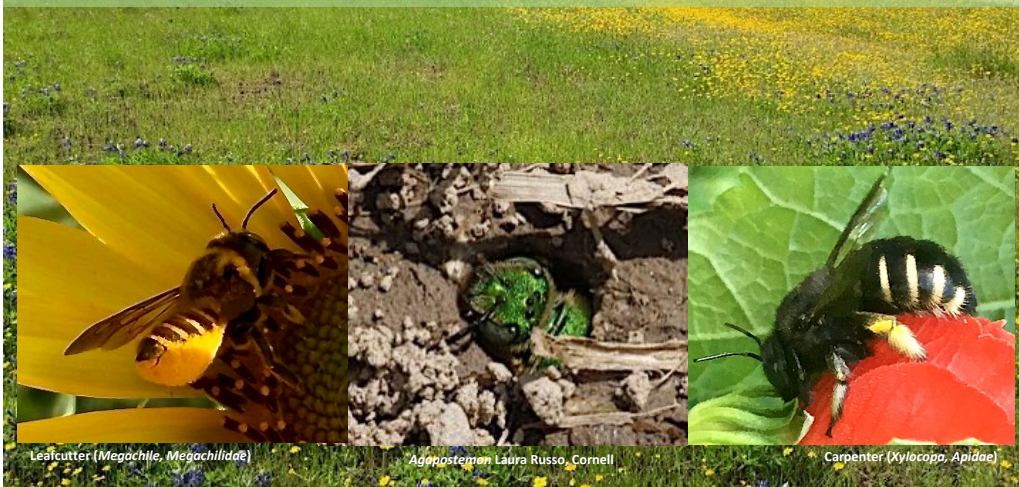

Leafcutter (*Megachile*, *Megachilidae*)

Agapostemon Laura Russo, Cornell

Carpenter (*Xylocopa*, *Apidae*)

**Scheme S7. Test questions #1-5 were projected on a screen for students' visual ID of flower-visiting insects**

**1. Fly & Bee**




A Which is the fly? B

4

**2. Wasp & Bee**




A Which is the wasp? B

5

**3. Bee & Flies. Which is the bee?**




A B




C D

6

**4. Which is the Honey Bee?**




A B




C D

7

**5. What sex is this bee?**  
*Megachile* sp. leafcutter

8

1. A. syrphid/hover fly  
B. *Dianthidium curvatum* (Megachilidae) bee  
resin mason leafcutter

2. A. *Anthidium florentinum* (Megachilidae) bee  
B. wasp

3. A. Tachinidae flesh fly  
B. Bombyliidae fly  
C. *Dianthidium curvatum* (Megachilidae)  
D. Tabanidae horse fly

4. A. *Apis mellifera* (Apidae) Western honey bee  
B, C. *Megachile fortis* (Megachilidae) male  
C. *Megachile* leafcutter bee (female); 5. *idem*

Note: Answer key (bottom right) for reference was not shown to students during tests in class

**Scheme S8. Test questions #6-10 refer to topics on bee ecology content knowledge**

“Native Bees of Texas” Course Quiz Answer Key      Your Bee Name (2018) \_\_\_\_\_

Questions 1-5 refer to 5 slides of insects projected on the screen (previous page).

1. Fly & bee. Which is the fly?      A, B
2. Wasp & bee. Which is the wasp?      A, B
3. Bee & flies. Which is the bee?      A, B, C, D
4. Four Bees. Which is the honey bee?      A, B, C, D
5. What sex is this native leafcutter bee?      A) male, B) female
6. Where do most native bee species nest (substrate in North America)?  
A) cavities, B) ground, C) trees, D) all of these, E) I don't know
7. What features can help distinguish a bee from a fly or wasp in a garden?  
A) 4 wings, B) fuzzy (branched) hair, C) flower constancy, D) all of these, E) I don't know
8. Why are bees important for ecosystem functions? Because they...  
A) are food for wildlife, B) pollinate most plants, C) help produce fruits & seeds, D) all, E) I don't know
9. What pollination services do bees provide for us?  
A) improve fruit quality, B) boost fruit yield, C) pollinate most of our fruits, D) all, E) I don't know
10. Why are native bee populations declining?  
A) they aren't multiplying, B) habitat loss, C) they reached carrying capacity, D) all, E) I don't know

What occupation or hobby best describes you? Please, circle or state (include retired/current).

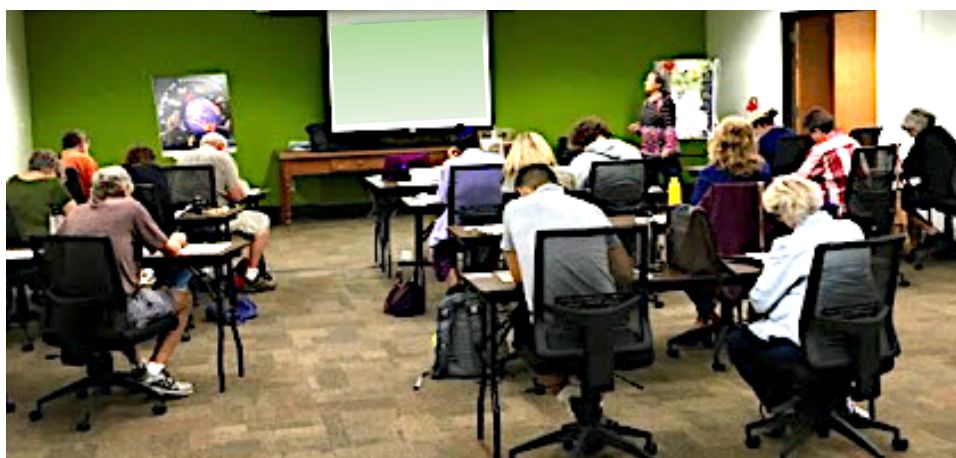

Photo Carlos Torres Verdin

**Scheme S9. Feedback Form: Overall & specific knowledge and open-ended feedback (top) 2018 & 2019  
Participant retrospective self-rating of perceived knowledge gains (bottom) – 2019 only**

**Feedback Form - Native Bees of Texas Course**

On a scale of 1-5, please rate this class based on the following criteria:

**How informative it was / How useful the knowledge or skills will be / How engaged were you as a participant?**

|                 |   |   |   |   |   |             |
|-----------------|---|---|---|---|---|-------------|
| Not informative | 1 | 2 | 3 | 4 | 5 | Informative |
| Not useful      | 1 | 2 | 3 | 4 | 5 | Useful      |
| Not engaged     | 1 | 2 | 3 | 4 | 5 | Engaged     |

**As a result of today's workshop, I am better able to ...**

**Understand the importance of native bees in ecosystems and agroecosystems**

|                   |          |         |       |                |
|-------------------|----------|---------|-------|----------------|
| Strongly disagree | Disagree | Neutral | Agree | Strongly agree |
| 1                 | 2        | 3       | 4     | 5              |

**Distinguish native bees from other flower visiting insects that look like them**

|                   |          |         |       |                |
|-------------------|----------|---------|-------|----------------|
| Strongly disagree | Disagree | Neutral | Agree | Strongly agree |
| 1                 | 2        | 3       | 4     | 5              |

**Identify common native bees of Central Texas with the help of the basic guides we used in this class**

|                   |          |         |       |                |
|-------------------|----------|---------|-------|----------------|
| Strongly disagree | Disagree | Neutral | Agree | Strongly agree |
| 1                 | 2        | 3       | 4     | 5              |

**Use this foundation of bee family taxonomy to learn more about the huge diversity of native bees on my own**

|                   |          |         |       |                |
|-------------------|----------|---------|-------|----------------|
| Strongly disagree | Disagree | Neutral | Agree | Strongly agree |
| 1                 | 2        | 3       | 4     | 5              |

**Use best management practices to conserve native bee habitat (based on nest habits, life cycles, plants)**

|                   |          |         |       |                |
|-------------------|----------|---------|-------|----------------|
| Strongly disagree | Disagree | Neutral | Agree | Strongly agree |
| 1                 | 2        | 3       | 4     | 5              |

**Choose the best combinations of native prairie plants to make a native bee garden in Central Texas**

|                   |          |         |       |                |
|-------------------|----------|---------|-------|----------------|
| Strongly disagree | Disagree | Neutral | Agree | Strongly agree |
| 1                 | 2        | 3       | 4     | 5              |

**Describe how you intend to use skills/knowledge that you learned in today's sessions in your practice/home**

**The best part(s) of this event was/were** \_\_\_\_\_

**This event could be improved by** \_\_\_\_\_

| PRE                                                                                                                                                          | POST                                                                                                                                                         |
|--------------------------------------------------------------------------------------------------------------------------------------------------------------|--------------------------------------------------------------------------------------------------------------------------------------------------------------|
| <b>BEFORE</b> participating in this workshop, I would rate my knowledge of native bees as:                                                                   | <b>NOW</b> , I would rate my knowledge of native bees as:                                                                                                    |
| <input type="radio"/> Poor<br><input type="radio"/> Fair<br><input type="radio"/> Good<br><input type="radio"/> Very Good<br><input type="radio"/> Excellent | <input type="radio"/> Poor<br><input type="radio"/> Fair<br><input type="radio"/> Good<br><input type="radio"/> Very Good<br><input type="radio"/> Excellent |
