# Supplementary material for: The Native Bees of Texas: Evaluating the Benefits of a Public Engagement Course
Source: MDPI journal article supplement (doi:10.3390/insects12080702), 2021-08-05
Supplement: s1 [file s1]

**NATIVE BEES OF TEXAS COURSE FLOWER-VISITING INSECT SURVEY DATA SHEET 2019**

Fixed Route Survey 90 x 2 m curved path ID/counted flower visitors on flowers steady pace one direction 15 min

**BLUE TEAM** 2-year expert, instructor (students: S & J)

Start 2:15 End 2:30 p.m.

| INSECT                                                                                    | BEE GROUP                                                        | COUNT (tally e.g. ### III) | SUM (e.g. 5) | TOTAL INSECT COUNTS       |
|-------------------------------------------------------------------------------------------|------------------------------------------------------------------|----------------------------|--------------|---------------------------|
| BEE<br>Little or no hair on underside of abdomen<br><br>(pollen on leg hair or elsewhere) | Honey bee ( <i>Apis mellifera</i> )                              | ### ### I                  | 11           |                           |
|                                                                                           | Bumble bee ( <i>Bombus</i> )                                     | IIII                       | 4            |                           |
|                                                                                           | Large carpenter bee ( <i>Xylocopa virginica</i> )                | ### II                     | 7            | <i>Xylocopa</i> 8         |
|                                                                                           | Large carpenter bee ( <i>Xylocopa micans</i> )                   | I                          | 1            |                           |
|                                                                                           | Hairy leg/Longhorn ( <i>Diadasia/Melissodes</i> )                | III                        | 3            |                           |
|                                                                                           | Green sweat bee ( <i>Agapostemon</i> )                           |                            | 0            |                           |
|                                                                                           | Striped sweat bee ( <i>Halictus</i> )                            |                            | 0            |                           |
|                                                                                           | Tiny dark bee ( <i>Lasioglossum</i> Hal./ <i>Ceratina</i> Apid.) |                            | 0            |                           |
|                                                                                           | Striped abdomen - miner                                          |                            | 0            |                           |
|                                                                                           | Striped abdomen - plasterer                                      |                            | 0            |                           |
| Brush of hair under abdomen carries pollen                                                | Striped abdomen - oil-collector                                  |                            | 0            |                           |
|                                                                                           | Hairy belly bee / Striped leafcutter ( <i>Megachile</i> )        | ### III                    | 8            |                           |
|                                                                                           | Metallic hairy belly bee – mason ( <i>Osmia</i> )                |                            | 0            |                           |
| No hair                                                                                   | Cuckoo/parasitic bee                                             |                            | 0            |                           |
|                                                                                           | Unidentified native bee                                          |                            | 0            |                           |
|                                                                                           | 6 Bee species, 5 Native bee species                              | BEE COUNT                  | 34           | 34 Bees – 11 HB = 23 NB   |
| NON-BEE                                                                                   | Flies ( <i>Bombyliid</i> )                                       | IIII                       | 4            |                           |
|                                                                                           | Wasps (Mexican honey)                                            | I                          | 1            |                           |
|                                                                                           | Butterflies/Moths (Skipper)                                      | ### I                      | 6            |                           |
|                                                                                           | 3 species non-bee insects                                        | NON-BEE COUNT              | 11           | 11 non-bees of 45 insects |
|                                                                                           | 9 species flower-visiting insects                                | INSECT COUNT               | 45           | 34 bees of 45 insects     |

NATIVE BEES OF TEXAS COURSE FLOWER-VISITING INSECT SURVEY DATA SHEET 2019

Observer-Recorder Names: S & J (Blue team with 2-year expert)

Start 2:15 End 2:30 p.m.

| INSECT                                                                                          | BEE GROUP                            | COUNT (tally e.g. IIII III)                                        | SUM (e.g. 5) | TOTAL INSECT COUNTS |
|-------------------------------------------------------------------------------------------------|--------------------------------------|--------------------------------------------------------------------|--------------|---------------------|
| BEE<br>Little or no hair on<br>underside of abdomen<br><br>(pollen on leg hair or<br>elsewhere) | Honey bee ( <i>Apis mellifera</i> )  |                                                                    | 0            |                     |
|                                                                                                 | Bumble bee                           | III III III II                                                     | 17           |                     |
|                                                                                                 | Large carpenter bee                  |                                                                    | 0            |                     |
|                                                                                                 | Hairy leg bee / Longhorn             |                                                                    | 0            |                     |
|                                                                                                 | Green sweat bee                      | II                                                                 | 2            |                     |
|                                                                                                 | Striped sweat bee                    |                                                                    | 0            |                     |
|                                                                                                 | Tiny dark bee                        |                                                                    | 0            |                     |
|                                                                                                 | Striped abdomen - miner              |                                                                    | 0            |                     |
| Brush of hair<br>under abdomen<br>carries pollen                                                | Striped abdomen - plasterer          |                                                                    | 0            |                     |
|                                                                                                 | Striped abdomen - oil-collector      |                                                                    | 0            |                     |
|                                                                                                 | Hairy belly bee / striped leafcutter |                                                                    | 0            |                     |
|                                                                                                 | Metallic hairy belly bee             |                                                                    | 0            |                     |
| No hair                                                                                         | Cuckoo bee / parasitic bee           |                                                                    |              |                     |
|                                                                                                 | Unidentified native bee              | III III III III III III III III<br>III III III III III III III III | 88           | Dropped             |
|                                                                                                 | 3 Bee species, 3 Native bee species  | BEE COUNT                                                          | 107          | 0 HB, 107 NB        |
|                                                                                                 | Flies                                | I                                                                  | 1            |                     |
| NON-BEE                                                                                         | Wasps                                | III                                                                | 5            |                     |
|                                                                                                 | Butterflies/Moths                    |                                                                    | 0            |                     |
|                                                                                                 | UFI                                  |                                                                    | 0            |                     |
|                                                                                                 | 2 species non-bee insects            | NON-BEE COUNT                                                      | 6            | 6                   |
|                                                                                                 | 5 species flower-visiting insects    | INSECT COUNT                                                       | 113          |                     |

\*Students said: "they weren't honey bees, but we didn't know what they were" (category Unidentified native bees)
