# Supplementary material for: The Native Bees of Texas: Evaluating the Benefits of a Public Engagement Course
Source: MDPI journal article supplement (doi:10.3390/insects12080702), 2021-08-05
Supplement: s1 [file s1]

NATIVE BEE COURSE FLOWER-VISITING INSECT SURVEY DATA SHEET 2019

Fixed Route Survey 90 x 2 m curved path ID/counted flower visitors on flowers steady pace one direction 15 min

**RED TEAM** 20-year expert (with S & C)

Start: 2:00 End: 2:15 p.m.

| INSECT  | BEE GENUS / SPECIES                      | COUNT (tally e.g. ### III) | SUM (e.g. 5) | TOTAL INSECT COUNTS      |
|---------|------------------------------------------|----------------------------|--------------|--------------------------|
| BEE     | Apis mellifera (honey bee)               | ### I                      | 6            |                          |
|         | Bombus pensylvanicus (bumble bee)        | ### I                      | 6            |                          |
|         | Xylocopa virginica (carpenter bee)       | ###                        | 5            | (2 carpenter spp)        |
|         | Xylocopa micans (carpenter bee)          | I                          | 1            |                          |
|         | Diadasia enavata (hairy leg/longhorn)    | I                          | 1            |                          |
|         | Melissodes (hairy leg/longhorn)          | ### II                     | 7            |                          |
|         | Megachile exile (hairy belly/leafcutter) | ### II                     | 7            | (2 leafcutter spp)       |
|         | Megachile sp. (hairy belly/leafcutter)   | ###                        | 5            |                          |
|         | Anthidiellum                             | III                        | 3            |                          |
|         | Centris atripes                          | I                          | 1            |                          |
|         | Coelioxys sp (cuckoo bee)                | I                          | 1            |                          |
|         | 11 Bee species, 10 Native bee species    | BEE COUNT                  | 43           | 43 Bees - 6 HB = 37 NB   |
| NON-BEE | Brachygastra mellifica (Honey wasp)      | I                          | 1            |                          |
|         | Skipper butterfly                        | ### I                      | 6            |                          |
|         | Butterfly                                | II                         | 2            |                          |
|         | 3 species non-bee insect                 | NON-BEE COUNT              | 9            | 9 non-bees of 52 insects |
|         | 14 species all flower-visiting insects   | INSECT COUNT               | 52           | 43 bees of 52 insects    |

NATIVE BEE COURSE FLOWER-VISITING INSECT SURVEY DATA SHEET 2019

Observer-Recorder Names: S & C (Red Team with 20-year expert)

Start: 2:00 End: 2:15 p.m.

| INSECT                                                                                          | BEE GROUP                            | COUNT (tally e.g. IIII III) | SUM (e.g. 5) | TOTAL INSECT COUNTS    |
|-------------------------------------------------------------------------------------------------|--------------------------------------|-----------------------------|--------------|------------------------|
| BEE<br>Little or no hair on<br>underside of abdomen<br><br>(pollen on leg hair or<br>elsewhere) | Honey bee ( <i>Apis mellifera</i> )  | IIII IIII IIII              | 15           |                        |
|                                                                                                 | Bumble bee                           | IIII IIII IIII II           | 17           |                        |
|                                                                                                 | Large carpenter bee                  | I                           | 1            |                        |
|                                                                                                 | Hairy leg bee / Longhorn             | I                           | 1            |                        |
|                                                                                                 | Green sweat bee                      |                             | 0            |                        |
|                                                                                                 | Striped sweat bee                    |                             | 0            |                        |
|                                                                                                 | Tiny dark bee                        |                             | 0            |                        |
|                                                                                                 | Striped abdomen - miner              |                             | 0            |                        |
| Brush of hair<br>under abdomen<br>carries pollen                                                | Striped abdomen - plasterer          |                             | 0            |                        |
|                                                                                                 | Striped abdomen - oil-collector      |                             | 0            |                        |
|                                                                                                 | Hairy belly bee / striped leafcutter |                             | 0            |                        |
|                                                                                                 | Metallic hairy belly bee             |                             | 0            |                        |
| No hair                                                                                         | Cuckoo bee / parasitic bee           |                             | 0            |                        |
|                                                                                                 | Unidentified native bee              | IIII IIII                   | 9            |                        |
|                                                                                                 | 4 Bee species, 3 Native bee species  | BEE COUNT                   |              | 43 TOT – 15 HB = 28 NB |
| NON-BEE                                                                                         | Flies                                | IIII I                      | 6            |                        |
|                                                                                                 | Wasps                                | I                           | 1            |                        |
|                                                                                                 | Butterflies/Moths                    | IIII IIII I                 | 11           |                        |
|                                                                                                 | UFI                                  |                             |              |                        |
|                                                                                                 | 3 species non-bee insects            | NON-BEE COUNT               |              | 18                     |
|                                                                                                 | 7 species flower-visiting insects    | INSECT COUNT                |              | 61                     |

NATIVE BEE COURSE FLOWER-VISITING INSECT SURVEY DATA SHEET 2019

Fixed Route Survey 90 x 2 m curved path ID/count flower visitors on flowers steady pace one direction 15 min

|                                       |                                                                                                                         |           |                    |
|---------------------------------------|-------------------------------------------------------------------------------------------------------------------------|-----------|--------------------|
| Location (Town, City) Lat/Long        | Wildflower Center, Austin, TX Lat. 30° 11' 7.60" N Long. -97° 52' 23.56" W                                              |           |                    |
| Date (dd/MMM/yyyy)                    | Saturday, 05/OCT/2019                                                                                                   |           |                    |
| Time (CST) (circle a.m. or p.m.)      | Start: 2:00                                                                                                             | End: 2:15 | a.m.   <u>p.m.</u> |
| Ambient air (circle one)              | Cool   Warm   <u>Hot</u>                                                                                                |           |                    |
| Skies (circle one)                    | <u>Clear</u>   Partly cloudy   Cloudy-bright overcast                                                                   |           |                    |
| Wind: Beaufort scale 0-4 (circle one) | Smoke rises ( <u>0</u> )   Leaves rustle (1)   You feel wind on face (2)  <br>Leaves move (3)   Small branches move (4) |           |                    |

Simplified Vegetation Survey: check veg. class, list dominant plants, estimate amount of inflorescences

| Site Vegetation               | <input checked="" type="checkbox"/> | Dominant Plants, common name (daisy, sage, legume...)                                             | Few<br>(1-50) | Moderate<br>(50-200) | Many<br>(200-500)                   |
|-------------------------------|-------------------------------------|---------------------------------------------------------------------------------------------------|---------------|----------------------|-------------------------------------|
| Open Woodland                 | <input type="checkbox"/>            |                                                                                                   |               |                      |                                     |
| Shrub-land                    | <input type="checkbox"/>            |                                                                                                   |               |                      |                                     |
| Grassland / Prairie           | <input type="checkbox"/>            |                                                                                                   |               |                      |                                     |
| Gardens ( <u>native</u> /not) | <input checked="" type="checkbox"/> | Native Texas Hill Country wildflowers, grasses<br>Salvia farinacea, Ageratina, Pavonia, Wedellia, |               |                      | <input checked="" type="checkbox"/> |
| Agricultural crops            | <input type="checkbox"/>            |                                                                                                   |               |                      |                                     |

Bio-Labs, University of Texas, Austin, TX Lat. 30°17'10.10" N, Long. -97°44'21.91" W
