# Supplementary material for: The Native Bees of Texas: Evaluating the Benefits of a Public Engagement Course
Source: MDPI journal article supplement (doi:10.3390/insects12080702), 2021-08-05
Supplement: s1 [file s1]

# Native Bees of Texas Course – Results – Data Processing and Analysis

2019 (corrected & checked again 5-20-21, 5-21-21)

Laurel Treviño processed and modified tables & graphs from Shelly Engelman TIDES Interns' reports

Laurel & Shelly reviewed problems that Laurel detected & corrected

**PROBLEM: FEEDBACK FORM** - Some questions were worded differently without changing their meaning. But wording differences are substantial in questions 1, 5, 6.

|   | 2018 Form                                                                                                        |   | 2019                                                                                                                                      |
|---|------------------------------------------------------------------------------------------------------------------|---|-------------------------------------------------------------------------------------------------------------------------------------------|
| 4 | Explain the importance of native bees in ecosystems and agroecosystems                                           | 4 | Understand the importance of native bees in ecosystems and agroecosystems                                                                 |
| 2 | Distinguish native bees from flower visiting insects that look like them                                         | 2 | Distinguish native bees from other flower visiting insects that look like them                                                            |
| 3 | Use a basic guide to ID common native bees in Texas gardens, parks, farms, wildlands                             | 3 | Identify common native bees of Central Texas with the help of the basic guides we used in this class                                      |
| 4 | Use my foundation of bee classification to learn more about native bee diversity                                 | 4 | Use this foundation of bee family taxonomy to learn more about the huge diversity of native bees on my own                                |
| 5 | Describe management practices to conserve native bee habitat given my knowledge of their nesting habits and diet | 5 | Use best management practices to conserve native bee habitat given my knowledge of bee nesting habits, life cycles, and plant preferences |
| 6 | Identify native prairie plants for native bees in Central Texas                                                  | 6 | Choose the best combination of native prairie plants for native bee gardens in Central TX                                                 |

**SOLUTION: Laurel re-worded & summarized Qs to make 2018 & 2019 match**

| Learning Objective Statements                                    | 2018 (n = 12) | 2019 (n = 19) |
|------------------------------------------------------------------|---------------|---------------|
| As a result of this course, I'm better able to ...               | Mean          | Mean          |
| Distinguish native bees from flower visitors that look like them | 4.50          | 4.26          |
| ID common native bees of Central Texas with course guides        | 4.33          | 4.00          |
| Use bee taxonomy to learn more about bee diversity               | 4.33          | 4.37          |
| Importance of native bees in agro/ecosystems                     | 4.75          | 4.58          |
| Best management practices to conserve native bee habitat         | 4.50          | 4.74          |
| Native plants used by native bees in Central Texas               | 4.25          | 4.53          |

| Learning Objective Ratings | 2018 (n = 12) |      |                  |     |     |     |     | 2019 (n = 19) |      |                  |     |     |     |     |
|----------------------------|---------------|------|------------------|-----|-----|-----|-----|---------------|------|------------------|-----|-----|-----|-----|
|                            | Mean          | SE   | (1)              | (2) | (3) | (4) | (5) | Mean          | SE   | (1)              | (2) | (3) | (4) | (5) |
| Distinguish insects        | 4.50          | 0.15 | 0%               | 0%  | 0%  | 50% | 50% | 4.26          | 0.13 | 0%               | 0%  | 5%  | 63% | 32% |
| Identify native bees       | 4.33          | 0.14 | 0%               | 0%  | 0%  | 67% | 33% | 4.00          | 0.15 | 0%               | 0%  | 21% | 58% | 21% |
| Diversity Taxonomy         | 4.33          | 0.14 | 0%               | 0%  | 0%  | 67% | 33% | 4.37          | 0.16 | 0%               | 0%  | 11% | 42% | 47% |
| Ecosystem services         | 4.75          | 0.13 | 0%               | 0%  | 0%  | 25% | 75% | 4.58          | 0.12 | 0%               | 0%  | 0%  | 42% | 58% |
| Conservation               | 4.50          | 0.15 | 0%               | 0%  | 0%  | 50% | 50% | 4.74          | 0.10 | 0%               | 0%  | 0%  | 26% | 74% |
| Native bee plants          | 4.25          | 0.18 | 0%               | 0%  | 8%  | 58% | 33% | 4.53          | 0.14 | 0%               | 0%  | 5%  | 37% | 58% |
| Overall Mean (n=6)         | 4.44          | 0.07 | -                | -   | -   | -   | -   | 4.41          | 0.11 | -                | -   | -   | -   | -   |
| SE (SD/SQRT(n)) = 2.45     | SD = 0.18     |      | 0.18/2.45 = 0.07 |     |     |     |     | SD = 0.26     |      | 0.26/2.45 = 0.11 |     |     |     |     |

# Native Bees of Texas Course – Results – Data Processing and Analysis

PROBLEM: TEST question order was different in 2018, 2019 (2-5-2020)

I compared original 2018 quizzes with 2018 report & compared with the 2019 report. Below is the ORIGINAL question order used in 2018 & 2019 reports

| Q. | Current order in <u>combined</u> results table (Shelly)      | Quiz | Report | Quiz | Report | Report | Report |
|----|--------------------------------------------------------------|------|--------|------|--------|--------|--------|
|    | (Shelly's pooled table only has Q1, Q2, etc., no wording)    | Key  | 2019   | 2018 | 2018   | Pre %  | Post % |
| 1  | Fly & bee. Which is the fly?                                 | 1    | 1      | 1    | 1      | 90     | 97     |
| 2  | Wasp & bee. Which is the wasp?                               | 2    | 2      | 2    | 2      | 80     | 70     |
| 3  | Bee & flies. Which is the bee?                               | 3    | 3      | 3    | 3      | 53     | 77     |
| 4  | Four Bees. Which is the honey bee?                           | 4    | 4      | 4    | 4      | 47     | 73     |
| 5  | What sex is this leafcutter bee?                             | 5    | 5      | 5    | 5      | 43     | 87     |
| 6  | Where do most native bees nest                               | 6    | 6      | 8    | 8      | 53     | 93     |
| 7  | What features can help distinguish a bee from a fly or wasp? | 7    | 7      | 9    | 9      | 33     | 87     |
| 8  | Why are bees important for ecosystem functions?              | 8    | 8      | 6    | 6      | 70     | 100    |
| 9  | What pollination services do bees provide us?                | 9    | 9      | 7    | 7      | 73     | 97     |
| 10 | Why are native bee populations declining?                    | 10   | 10     | 10   | 10     | 80     | 93     |

SOLUTION: Laurel checked 2018 & 2019 quiz results & report tables several times to make this table. (5-20-21 checked again)

| Q.    | Accuracy of insect identification and bee knowledge      | 2018     | 2018      | n = 11  | 2019     | 2019      | n = 19  |
|-------|----------------------------------------------------------|----------|-----------|---------|----------|-----------|---------|
|       | (original order in 2018)                                 | Pre-test | Post-test | p-value | Pre-test | Post-test | p-value |
| 1     | Fly & bee. Which is the <u>fly</u> ?                     | 73%      | 91%       | 0.303   | 100%     | 100%      | 1.000   |
| 2     | Wasp & bee. Which is the <u>wasp</u> ?                   | 73%      | 73%       | 1.000   | 84%      | 68%       | 0.187   |
| 3     | Bee & flies. Which is the <u>bee</u> ?                   | 36%      | 73%       | 0.102   | 63%      | 79%       | 0.331   |
| 4     | Bees. Which is the <u>honey bee</u> ?                    | 55%      | 82%       | 0.193   | 42%      | 68%       | 0.056   |
| 5     | What <u>sex</u> is this leafcutter bee?                  | 45%      | 91%       | 0.028*  | 42%      | 84%       | 0.007** |
| 6 (8) | Where do most native bees nest?                          | 64%      | 100%      | 0.035*  | 21%      | 95%       | 0.000** |
| 7 (9) | What features help distinguish a bee from a fly or wasp? | 55%      | 91%       | 0.068   | 53%      | 89%       | 0.005** |
| 8 (6) | Why are bees important for ecosystem functions?          | 55%      | 73%       | 0.408   | 74%      | 100%      | 0.021*  |
| 9 (7) | What pollination services do bees provide us?            | 55%      | 100%      | 0.015*  | 84%      | 100%      | 0.083   |
| 10    | Why are native bee populations declining?                | 91%      | 100%      | 0.363   | 74%      | 89%       | 0.083   |
|       | Overall average                                          | 60%      | 87%       | 0.009** | 64%      | 87%       | 0.000** |

Native Bees of Texas Course – Results – Data Processing and Analysis

Tables with new, standardized FINAL question order, all stats checked & correct (Laurel Trevino 4-16-20)

Laurel made table below with same question order in both years to make dumbbell/dot charts comparable side-by-side (May 2020)

| % Correct Responses Pre & Post-Course |                                                    | 2018, (n = 11) |            |              |            |         | 2019, (n=19) |            |              |            |         |
|---------------------------------------|----------------------------------------------------|----------------|------------|--------------|------------|---------|--------------|------------|--------------|------------|---------|
| Test Questions                        |                                                    | Correct Pre    | Std. Error | Correct Post | Std. Error | p-value | Correct Pre  | Std. Error | Correct Post | Std. Error | p-value |
| 1                                     | Fly & bee. Which is the fly?                       | 73%            | 0.14       | 91%          | 0.09       | 0.303   | 100%         | 0.00       | 100%         | 0.00       | 1.000   |
| 2                                     | Wasp & bee. Which is the wasp?                     | 73%            | 0.14       | 73%          | 0.14       | 1.000   | 84%          | 0.09       | 68%          | 0.11       | 0.187   |
| 3                                     | Bee & flies. Which is the bee?                     | 36%            | 0.15       | 73%          | 0.14       | 0.102   | 63%          | 0.11       | 79%          | 0.10       | 0.331   |
| 4                                     | Bees. Which is the honey bee?                      | 55%            | 0.16       | 82%          | 0.12       | 0.193   | 42%          | 0.12       | 68%          | 0.11       | 0.056   |
| 5                                     | What sex is this leafcutter bee?                   | 45%            | 0.16       | 91%          | 0.09       | 0.028*  | 42%          | 0.12       | 84%          | 0.09       | 0.007** |
| 6                                     | What features help distinguish bees, flies, wasps? | 55%            | 0.16       | 91%          | 0.09       | 0.068   | 53%          | 0.12       | 89%          | 0.07       | 0.005** |
| 7                                     | Where do most native bees nest?                    | 64%            | 0.15       | 100%         | 0.00       | 0.035*  | 21%          | 0.10       | 95%          | 0.05       | 0.000** |
| 8                                     | Why are bees important for ecosystem functions?    | 55%            | 0.16       | 73%          | 0.14       | 0.408   | 74%          | 0.10       | 100%         | 0.00       | 0.021*  |
| 9                                     | What pollination services do bees provide us?      | 55%            | 0.16       | 100%         | 0.00       | 0.015*  | 84%          | 0.09       | 100%         | 0.00       | 0.083   |
| 10                                    | Why are native bee populations declining?          | 91%            | 0.09       | 100%         | 0.00       | 0.363   | 74%          | 0.10       | 89%          | 0.07       | 0.083   |
| Overall Mean                          |                                                    | 60%            | 0.05       | 87%          | 0.03       | 0.009** | 64%          | 0.04       | 87%          | 0.02       | 0.000** |

corrected (5-20-21 checked), (5-21-2021 checked)
