# Supplementary material for: The Native Bees of Texas: Evaluating the Benefits of a Public Engagement Course
Source: MDPI journal article supplement (doi:10.3390/insects12080702), 2021-08-05
Supplement: s1 [file s1]

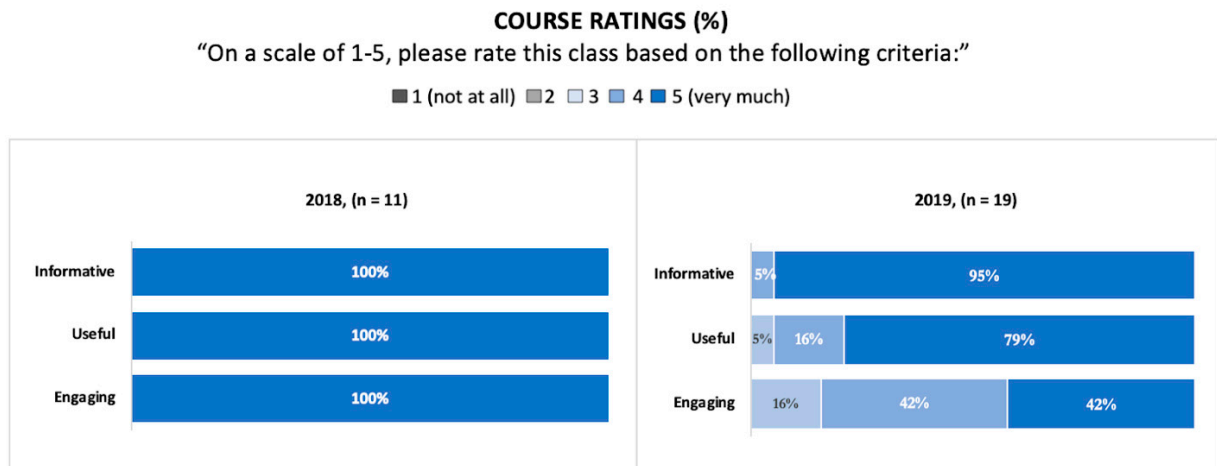

**Figure S1.** Overall Course Ratings

Participants rated the course based on three criteria, how informative, useful, and engaging it was for them. Mean ratings, on a 5-point Semantic Differential Scale (1, Not at all to 5, Very much), expressed as percent of each criterion. “On a scale of 1 to 5, the class was...” (see Supplementary Table S8).
