# Supplementary material for: The Native Bees of Texas: Evaluating the Benefits of a Public Engagement Course
Source: Insects. 2021 Aug 5;12(8):702. doi: 10.3390/insects12080702 (PMC8396608; doi:10.3390/insects12080702)
Supplement: Supplementary file 1 [file insects-12-00702-s001.zip]

Archive with 4 entries (4 files):
- Native Bees of Texas  Data Available Public Archive.zip
- Supplementary-Figures_Native-Bees-Texas.pdf
- Supplementary-Schemata_Native-Bees-Texas-Compress.pdf
- Supplementary-Tables_Native-Bees-Texas.pdf
